## Quantifying microbial guilds

Juan Rivas-Santisteban\*<sup>1</sup>, Pablo Yubero<sup>2</sup>, Semidán Robaina-Estévez<sup>3</sup>, José M. González<sup>3</sup>, Javier Tamames<sup>1</sup>, and Carlos Pedrós-Alió<sup>1</sup>

<sup>1</sup>Microbiome Analysis Laboratory, CNB-CSIC, Spain. E-mail\*: [jrisant@outlook.es](mailto:jrisant@outlook.es)

<sup>2</sup>Logic of Genomic Systems Laboratory, CNB-CSIC, Spain.

<sup>3</sup>Department of Microbiology, University of La Laguna, Spain.

### ABSTRACT

The ecological role of microorganisms is of utmost importance due to their multiple interactions with the environment. However, assessing the contribution of individual taxonomic groups has proven difficult despite the availability of high throughput data, hindering our understanding of such complex systems. Here, we propose a quantitative definition of guild that is readily applicable to metagenomic data. Our framework focuses on the functional character of protein sequences, as well as their diversifying nature. First, we discriminate functional sequences from the whole sequence space corresponding to a gene annotation to then quantify their contribution to the guild composition across environments. In addition, we distinguish between sequence spaces that have different ways of carrying out the function. We demonstrate the validity of our approach by quantifying the guild of ammonia oxidation, and further reveal novel ecological dynamics of putrescine uptake guild in marine ecosystems. Thus, guilds help elucidate the functional role of different taxonomic groups with profound implications in the study of microbial communities.

## 20 INTRODUCTION

21 Organisms profoundly modify their environment. A clear example of this is the dramatic  
22 change in atmospheric oxidation potential that occurred in the primitive Earth, probably during  
23 the neo-archaic period – around 2.8 Gyr ago (Cavalier-Smith, 2006; Stüeken et al., 2012). The  
24 multiplication of biological functions related to oxygenic photosynthesis led to such planetary  
25 shift. Therefore, understanding ecology and evolution of functions is essential to predict such  
26 important changes. Specifically, functions carried out by microbes are, because of the simplicity,  
27 adaptability and ubiquity of these organisms, fundamental in the main nutrient cycles (Arrigo,  
28 2005). Determination of microbial functions in ecosystems relies heavily on techniques based  
29 on the annotation of genomic information obtained from environmental DNA. This approach,  
30 however, presents a challenge to reach an insightful comprehension of such functions (Tikhonov,  
31 2017; Koskella et al., 2017).

32 Biological functions can be understood as the causal relationship between the structural infor-  
33 mation contained in a biocatalyst (an effector) and the interaction it facilitates on a specific substrate.  
34 There are different types of biocatalysts, such as ribozymes or ribonucleoprotein complexes (Cech,  
35 2009), but most consist of gene-encoded proteins with prosthetic groups. This causal relationship  
36 is affected by the environment (Zaks and Klibanov, 1986; Johansson et al., 2011) and is shaped  
37 by evolution, mainly through gene duplication, adaptation and drift (Masel, 2011; Altenhoff and  
38 Dessimoz, 2012; Lynch et al., 2016). If the environment changes, that causal relationship may  
39 be compromised or extinguished (Lanyi, 1974; Ladero et al., 2006). As a consequence of these  
40 processes, a variety of distinct proteins that fulfil the same function (Fig. 1) is generated (Liberles  
41 et al., 2012; Dourado et al., 2021).

42 Most functions are inherited vertically and therefore, taxonomically related organisms will often  
43 share a similar set of functions (Baiser and Lockwood, 2011). However, there are alternatives to  
44 vertical inheritance. A major example is horizontal transfer (van de Guchte, 2017), which has  
45 been observed even among organisms with markedly different taxonomic positions (Husnik and  
46 McCutcheon, 2018). Also, dissimilar sequences carrying out the same function may emerge by

47 convergent evolution (Pagé et al., 2008; Storz, 2016). Therefore, the assigned taxonomic position  
48 alone may not be able to predict the occurrence of some functions.

49 Thus, there is a need for a non-taxonomic approach to explain the ecology of microbial functions.  
50 The ecological guild concept solves this problem. One classic definition of a guild is as follows:  
51 “a group of species that exploit the same class of environmental resources in a similar way (. . . )  
52 without regard to taxonomic position, that overlaps significantly in their niche requirements” (Root,  
53 1967). Thus, guilds are broadly understood as the functional groups into which communities can  
54 be subdivided, unlike the concept of population, which consists of taxonomical groups.

55 The guild concept was designed for the ecology of macroorganisms and became popular in  
56 the 1970s. This viewpoint triggered research interest into niche partitioning. For example, all  
57 insect predators can be studied together as they are members of the *insectivorous* guild, without  
58 considering the taxonomic group they currently belong to (Koran and Kropil, 2014; Nebel et al.,  
59 2010).

60 However, the classical definition does not fit comfortably with the needs of microbial ecology.  
61 In macrofauna, guilds are defined by feeding behavior (Hohberg, 2003). Different behaviors have to  
62 do with very complex genetic interactions leading to ethology and information transmitted through  
63 nurture (Chiel and Beer, 1997; Hillis and Mallory, 1996). Thus, the nutrient acquisition carried  
64 out by an insectivorous guild: searching, capturing, ingesting and digesting an insect, is dependent  
65 on a vast series of genes with the corresponding molecular processes. In contrast, microbial  
66 feeding phenotypes are closer to their genotypes (Torsvik and Øvreås, 2002). In prokaryotes, the  
67 acquisition of a nutrient is almost exclusively dependent on a few proteins (Gregory, 2005; Gregory  
68 and DeSalle, 2005).

69 Despite the above considerations, several scientists have tried to use the classic guild concept  
70 to explain the functional complexity of microbiomes (Veshareh and Nick, 2021; Jones et al., 2014;  
71 Martinović et al., 2021). However, there is a lack of consensus on how to define and quantify  
72 microbial guilds. Below are some examples:

73 Wu and colleagues use the term microbial guild to assign a functional value solely based on

74 spatial co-occurrence among taxa (Wu et al., 2021). The problems with this approach are clear,  
75 as co-occurrence in space does not necessarily imply sharing the same function, especially in  
76 microorganisms.

77 A rather ingenious idea attempted to discriminate between different guilds of diatoms based  
78 on the morphology and motility of these single-celled organisms (Passy, 2007). Passy's argument  
79 was that the nutritional traits of several diatoms seem to correlate with the presence of motility.  
80 However, it is not a suitable solution for all microbes, because it is a very specific case of limited  
81 application outside this group of organisms. This approach precludes the generalization of guilds,  
82 which is the main goal of the present study.

83 Other authors proposed that guilds should be restricted to taxa exploiting the same resource  
84 in a given space and time (Fauth et al., 1996; Nemergut et al., 2013). However, it is sensible to  
85 think that the guild concept should not limit itself either spatially nor temporally, since ecological  
86 dynamics are derived from spatiotemporal comparisons. In addition, we consider it relevant to  
87 understand how the function is performed in different scenarios in order to quantify its contribution  
88 to the guild.

89 Pedrós-Alió defined more precisely what microbial guilds represent, as opposed to guilds of  
90 macroorganisms: "*a group of microorganisms using the same energy and carbon sources and the*  
91 *same electron donors and acceptors*" (Pedrós-Alió, 1989). However, microbes can share all energy  
92 and carbon sources and can still perform differently on the key substrate. For example, consider  
93 two coexisting methanotrophs: they will share membership in the *methane consumption* guild most  
94 of the time, but one of them may remove methane only when it is abundant, and the other when  
95 it is scarce. The guild definition must consider the particularities of how the relevant function is  
96 carried out.

97 All things considered, a guild is a diverse group of organisms benefiting from a key resource  
98 through evolving functional effectors, regardless of their taxonomic assignment, and where the  
99 success of the function in different circumstances is dependent on the diversification of its effectors.  
100 This definition not only fits the specific needs of molecular ecology, but is also applicable to all

101 organisms.

102 Consequently, we postulate that each member of the guild can fulfil the definitory function,  
103 but different mechanisms to perform it inevitably emerge as a result of evolution. The classical  
104 definition was imprecise: not only the phylogenetic lineage, but the way in which the function is  
105 carried out are both irrelevant for an organism to be considered a member of a guild. However, to  
106 understand the ecology of the guild, it is still important to know its members and how they perform  
107 the function across different environments. In this work, we present a method for the quantification  
108 of guilds considering this redefinition, which reconciles the traditional view of guilds with its use  
109 to study microbial functions.

## 110 RESULTS

### 111 1. Quantification method for microbial guilds

112 To quantitatively introduce our definition of guild into the study of microbes, we considered the  
113 microbial guild as a 3D matrix that relates taxonomy, ways of performing the function (implemen-  
114 tations) and environments. (Fig. 2A).

115 One dimension is the taxonomy assigned to the functional effector, in our case, the protein(s).  
116 This has been the only variable considered in the previous studies of guilds.

117 A second one is the different ways in which the function can be performed. That is, how  
118 the function is implemented in the different taxa. For example, high affinity vs. low affinity  
119 transport of dissolved ammonia, or thermophilic vs. psychrophilic oxidation of acetate. In the  
120 context of microbial guilds, an implementation can be associated with a specific gene or set of  
121 genes that encode the functional traits necessary for carrying out the desired function. Often, an  
122 implementation corresponds precisely to taxonomy. However, in many instances a single taxon may  
123 have more than one implementation and a given implementation may be shared by several taxa.  
124 Thus, the need to have this second dimension. For example, in the polyamine uptake guild analyzed  
125 later, the taxon UBA11654 sp001629325 (which represents an unclassified Gammaproteobacteria  
126 isolated from the Red Sea) contributes to the guild through two different implementations of the  
127 molecular function defined by the gene *potF*.

128 The third dimension, finally, is the environment in which the guild is conducting its activity.  
129 As will be seen later, the taxon just mentioned, for example, appears with two implementations in  
130 the epipelagic, but with only one in the mesopelagic, and it does not contribute to the function in  
131 the bathypelagic.

132 In practice we quantify the contribution of different taxa and implementations across environ-  
133 ments to the guild of function  $f$  as the three-dimensional array  $K_f \in \mathcal{M}_{T,I,E}$  with elements  $k_{t,i,e}$ ,  
134 where the subindices  $t$ ,  $i$ , and  $e$  represent taxa, implementations and environments, respectively.  
135 Its elements are calculated as:

$$136 \quad k_{t,i,e} = \left( \sum_s a_s \right) \frac{d_{obs}}{d_{exp}} u, \quad (1)$$

137 The first term is the sum of sequence abundances  $a_s$  among the corresponding sequences (for  
138 which the subindices  $t$ ,  $i$  and  $e$  are implied). Second, and because we postulate that the richness of  
139 unique sequences is a key factor for the resilience of the function over time, we include the ratio  
140 between observed and expected sequence richness,  $d_{obs}$  and  $d_{exp}$ , respectively (Fig. 2B). The term  
141  $d_{obs}$  is calculated by the sum of unique sequences. The denominator  $d_{exp}$  is necessary to correct  
142 for the fact that greater richness is invariably observed when there are many sequences contributing  
143 to the function. Thus,  $d_{exp}$  empirically follows a power function of the summed abundances:

$$144 \quad d_{exp} = c \left( \sum_s a_s \right)^\gamma, \quad (2)$$

145 where  $c$  and  $\gamma$  are gene and context specific constants. In this way we reward those instances with  
146 higher sequence richness than inferred from their abundance and we penalize those with lower  
147 than expected richness (Fig. 2C). The predictive ability of this empirical relationship allows the  
148 estimation of  $d_{exp}$  in several genes tested (Fig. 3).

149 Finally, the third term of (1) evaluates the univocity for the function  $u \in [0, 1]$ . Thus,  $u = 1$   
150 in the case that all the sequences fulfil the function perfectly, or  $u = 0$  if the sequences are not  
151 capable of performing it. Although in our case we only consider a binary classification of function,

152 this definition could take into account intermediate values, for example by assessing the average  
153 efficiency to accomplish the function.

154 In summary, higher  $k$  values reflect the availability in the environment of a given implemen-  
155 tation, the occurrence of unexpected sequence diversity, and the likelihood of the sequences to  
156 perform the guild-definitory function. Therefore, and considering the dimensions of the guild  
157 hypervolume, we should have a lot of positions where  $k = 0$  (there are no sequences contributing  
158 to the guild), and clouds where the values take  $k > 0$ . In this work, we relied on normalized  
159 abundance metagenomic outputs to quantify guilds.

## 160 **2. Strict discrimination of functional paralogs improves guild assessment.**

161 Prior to microbial guild quantification, a conservative criterion is needed in order to retain  
162 strictly functional sequences only (those with  $u = 1$ ), since automatic classification relies on  
163 similarity with known sequences, and this produces many false positives, because similarity alone  
164 is often not accurate enough to discriminate functionality (Valencia, 2005). In this section we  
165 present a method that greatly improves automatic function annotation by using reference trees as  
166 functional sequence classifiers.

167 We will illustrate the procedure using ammonia oxidation as an example. The effector of this  
168 function is typically ammonia monooxygenase (AMO), which catalyzes the reaction of ammonia  
169 and oxygen to produce hydroxylamine. In particular, the gene encoding the A subunit (*amoA*),  
170 which conducts the catalytic activity of the enzyme complex (Ensign et al., 1993; Rotthauwe et al.,  
171 1997) has undergone extensive functional description. Therefore, the sequence spaces of *amoA* are  
172 well characterized in the literature (Martens-Habbena et al., 2009; Alves et al., 2018; Khadka et al.,  
173 2018; Wright et al., 2020). Thus, we discriminate between implementations carrying out mostly  
174 ammonia oxidation (mainly archaean AMO, AOA; and bacterial AMO, AOB) and those others  
175 that have higher affinities for methane or other simple aliphatic alkanes (Rochman et al., 2020),  
176 contributing to two or more guilds.

177 The particularity of this function is that its genes have evolved among taxonomical groups  
178 with different metabolic pathways. Thus, the enzyme has shifted from an ancestor with moderate

179 affinity for a broad spectrum of substrates to a restricted substrate specificity, suboptimal for the  
180 substrate preference of each organism (Lau et al., 2016). Nonetheless, some groups of sequences  
181 remain with some promiscuity or ambivalence; for example, the pMMO effector is able to oxidize  
182 ammonium, while its main substrate is methane (Ward, 1987; Oudova-Rivera et al., 2023), or the  
183 particulate butane monooxygenase (pBMO) that oxidizes butane (Sayavedra-Soto et al., 2011).  
184 This means that specific *amoA*-like sequences behave as functional paralogs, so we must recognize  
185 them as false positives ( $u = 0$ ) in order to evaluate the ammonia oxidation function present in the  
186 metagenomes.

187 Considering the above, a reference *amoA* tree was built to discriminate orthologs from paralogs  
188 in our metagenomic dataset using an in-house curated oceanic database (Methods; Sup. Fig. A).  
189 Then, we retrieved *amoA* sequences from Malaspina megagenomes and placed them onto the tree.  
190 We found that from a total of 129 unique automatically annotated sequences, 40 were discarded  
191 by the tree placement due to paralogy (31.0%), and only 82 were *bona fide* for ammonia oxidation  
192 (63.5%, Fig. 4). In this way, we don't rely on simple automatic annotations, as it is usually done.  
193 Instead, we used curated and annotated trees to infer the belonging of a particular sequence to  
194 one of the functional clusters of the tree defined by experimental evidence (full *amoA* clustering  
195 provided in Sup. Fig. B). This allows to accurately distinguish the functionality of particular genes.

### 196 **3. High quality reference tree building without direct functional evidence.**

197 Unfortunately, most genes have limited or ambiguous evidence of functional paralogies. This  
198 is the case of *potF*, which encodes a subunit of an ATP-binding cassette (ABC transporter) that  
199 binds and imports putrescine-like polyamines to be mainly used as source of N. These proteins  
200 must fulfil a specific function in the periplasm across a variety of external environments, leading  
201 to a vast diversity in transporter sequences sometimes not correlated with taxonomy (Offre et al.,  
202 2014), making automatic annotations challenging.

203 As before, to improve the automatic annotation we needed a reference tree (Fig. 5). Thus, we  
204 relied on the Hidden Markov Model corresponding to polyamine binding (KEGG K11073, Pistocchi  
205 et al. (1993)) to identify functional sequences across the same oceanic database used previously



206 and to build the reference tree with them. We used the resulting tree to further discard long-  
207 branching metagenomic sequences (i.e. distances larger than the tree's original diameter), instead  
208 of discriminating functional paralogs (because we did not have this kind of information, as in the  
209 previous example with *amoA*).

210 We evaluated our metagenomes from Malaspina samples. Among the phylogenetic placements  
211 of the short environmental queries we discarded 71 queries (4.13%) as being false positives  
212 according to the reference tree. The rest of the queries populated all the tree (Fig. 6), suggesting  
213 that most known marine polyamine-like binding proteins are represented in our dataset. Moreover,  
214 most of the recovered sequences fit robustly in the reference tree (mean weighted likelihood ratio  
215 of 0.89), showing that the placement was robust.

#### 216 **4. Specific environmental features shape the protein sequence space of *potF*.**

217 The reconstructed reference tree showed a collection of HMM-retrieved *potF*-like sequences  
218 grouped by their similarity where each sequence is represented by a leaf of the tree. On the one  
219 hand, the same organism may have more than one sequence, which may be either in distant or  
220 nearby positions in the tree, e.g., *Pseudomonas alcaligenes* appeared in three different clusters  
221 (Sup. Fig. C). On the other hand, sequences from distant taxa may unexpectedly converge in  
222 similarity. This is the case of *Oceanobacter kriegii* and *Thalassobius gelatinovorius*, an alpha- and  
223 gamma-proteobacterium, respectively, whose normalized phylogenetic distance on a 16S tree is  
224 large, while being remarkably close in the *potF*-like reference tree (0.67 vs 0.16; further details  
225 available in Sup. Fig. D). In summary, the phylogenetic signal poorly predicts divergence in  
226 *potF*-like protein sequences.

227 The ability of a protein to perform a function is influenced by the surrounding environment,  
228 thus requiring specific conditions to perform it effectively. In particular, transporters are exposed  
229 to changing environments. Therefore, we wished to address if the unexpected sequence divergence  
230 of the polyamine binding proteins depend on environmental conditions.

231 To that aim, we searched in the literature for the environmental preferences of the bacteria  
232 represented in the reference tree (Sup. Table 1), and searched for nodes grouping sequences that

233 significantly shared similar environmental properties (one-tailed tests  $p$ -values  $< 0.003$ ; Methods).

234 First, we observed significant nodes that grouped only a handful of sequences, highlighting  
235 properties that the taxonomy accurately predicts, e.g., hydrocarbon presence in growth condi-  
236 tions (Moreno-Ulloa et al., 2020). Representation of significant nodes is provided in Supplementary  
237 Figure E. Second, we found significant nodes that grouped all sequences in just a few clusters under  
238 common preferences to temperature, salinity and acidity, suggesting groups undergoing common  
239 environmental adaptation, or horizontal gene transfer (Fig. 5 and Sup. Table 2). These significant  
240 nodes were also represented in Supplementary Figure D, showing a clear correspondence between  
241 unexpected divergence of inner nodes and some environmental variables affecting protein folding.  
242 Therefore, we use the latter grouping to define different implementations and classify sequences  
243 accordingly, highlighting broader trends and properties across the reference tree of *potF*.

## 244 **5. Functional clustering reveals ecological dynamics in the polyamine uptake guild.**

245 Furnished with a functional *potF*-like sequence classifier, we finally proceeded to quantify the  
246 polyamine uptake guild in the Malaspina circumnavigation samples, showcasing the potential of our  
247 approach to reveal fundamental ecological dynamics among the oceanic layers. Since this specific  
248 guild is believed to be ubiquitous in the ocean, it was ideal to test whether there were differences  
249 within the guild between depths.

250 We decided to compare samples from three different marine environments: epipelagic (0 –  
251 200 m), mesopelagic (200 – 1000 m) and bathypelagic (1000 – 4000 m). Using the classified  
252 sequences (Fig. 6) we calculated the  $k$  values for each taxon, cluster and environment. We  
253 represented the  $k$  values with radial plots (Fig. 7) to visualize the structure of the guild. In these  
254 graphs, each radial plot shows one environment, each direction represents an implementation of  
255 the function (or cluster in the tree), and the length of the spokes represents the impact coefficient  $k$   
256 that, as explained, reflects abundance and sequence diversification. This representation of the data  
257 provides a visual and quantitative summary of the guild structure.

258 Overall, our results show that the polyamine uptake guild was important throughout the entire  
259 water column. First, the main forms of polyamine uptake were all saline implementations (*cIa*,

260 *cIb*, and *cIII*); which is coherent with the fact that the samples were all marine. Implementation  
261 *incertae* included the placed sequences that were filtered out as false positives (Fig. 6) and is  
262 thus empty. In addition, the function exhibited considerable redundancy, since there were different  
263 implementations in every sample and several taxa with each implementation.

264 Specifically, the guild structure changed significantly between the epipelagic and mesopelagic,  
265 both in taxonomic composition and in the estimated strength of each of the implementations.  
266 Between the mesopelagic and bathypelagic the pattern is remarkably taxon-preserved, but the  
267 net contribution of each implementation to the overall function changes slightly, with more top  
268 contributors above the fixed threshold in the bathypelagic. However, the polyamine uptake function  
269 persists throughout the water column despite the changes in taxonomic composition, evidencing a  
270 species turnover with depth. Therefore, our framework reveals non-trivial changes in guild structure  
271 in the ocean despite the ubiquity of the function.

272 In addition, the approach demonstrates its potential to track and estimate ecological dynamics.  
273 We can seamlessly measure changes between environments in the guild contribution by computing  
274  $\Delta k_e = k_e/k_{e-1}$ , where  $k_e$  represents the contribution of all taxa and all implementations in  
275 environment  $e$ . In this example,  $\Delta k_{meso}$  polyamine uptake is equal to 1.66, while  $\Delta k_{bathy}$  is 0.84.  
276 Thus, even though several implementations are more important and taxonomically diverse in the  
277 bathypelagic, the main changes occur between the epipelagic and the mesopelagic.

278 In addition, the increment of  $k$  between environments can be calculated for the  $i$ -th imple-  
279 mentation as  $\Delta k_{i,e} = k_{i,e}/k_{i,e-1}$ . Some examples of functional analysis with this ratio are shown  
280 in Figure 8. In our data, the most remarkable change correspond to  $\Delta k_{cIIb,meso} = 7.92$  (dark  
281 pink in Fig. 8), suggesting an implementation-dependent bloom in the mesopelagic. This is an  
282 interesting finding, since the implementation *cIIb* is the one that has the closest relationship with  
283 large pH variability; a variable that, coincidentally, reaches its minimum value in the mesopelagic.  
284 This confirms the ability of our guild approach to reveal environmental-dependencies of biological  
285 functions in general.

286 However, this is not the case for the most important contributors, such as implementation *cIa*,

287 where the most important layer is barely the epipelagic, according to these metrics:  $\Delta k_{cIa,meso} =$   
288 0.94 and  $\Delta k_{cIa,meso} = 0.72$ . These analyses can be taken further to study the contribution of  
289 specific taxa to the  $k$ -value in a particular environment and implementation.

## 290 DISCUSSION

### 291 Diversification of functional protein sequences

292 As we have introduced, most functions are performed by evolving proteins. In addition, each  
293 function is often found in many different environments. Thus, diversification of the function-  
294 capable sequences is not only expected but frequently observed (Fay and Wu, 2003; Pascual-García  
295 et al., 2010; Soria et al., 2014). In order to quantify microbial guilds, the issue of how proteins  
296 diversify while maintaining function must be considered.

297 First, diversification of a protein can lead to promiscuity or pleiotropy (Hult and Berglund, 2007;  
298 Ruelens et al., 2023), especially when horizontal transfer events occur (Glasner et al., 2020). It is  
299 then likely that the protein may partial or totally lose its original function, undergoing a process of  
300 readaptation to its new genomic and environmental context (Deng et al., 2010; Manara et al., 2012;  
301 Husnik and McCutcheon, 2018). When there is sufficient functional evidence that these sequences  
302 do not play the definitory function, they can be filtered out (Methods). In the present work, all  
303 inferred guild marker sequences were carefully discriminated from those spurious sequences that  
304 were not functional. Where it could not be determined from the available evidence whether or not  
305 they fulfilled the function, they were categorized separately from true positives, as shown in Figure  
306 1 and Figure 7 (see *incertae* implementation).

307 Once the truly functional sequence spaces have been identified (i.e. the implementations of the  
308 function), the next question is to determine what is distinctive about these divergent groups. Neutral  
309 drift undoubtedly contributes to this diversification (Kimura, 1991). However, certain degree of  
310 functional flexibility in a population of sequences may be the product of selection, allowing proteins  
311 to have slightly different kinetics in diverse environments, as well as acting upon more than one  
312 substrate (Alam et al., 2009; Offre et al., 2014; Zhao, 2022). We can expect that sequence variants  
313 adapted to similar conditions will be closer to each other. Thus, if the entire sequence space

314 performing exactly the same function is grouped into clusters of sequence similarity, groups of  
315 sequences that are expected to work alike in similar environments shall emerge (Figs. 5 and 6),  
316 instead of at-random groupings. For quantification of microbial guilds, we defined the function  
317 implementations as these groups of sequences that work in a similar way (i.e.: binding affinity,  
318 substrate spectrum, temperature, pH or salinity conditions, etc.).

### 319 **How the environment constrains microbial protein diversification**

320 Like all other organisms, microbes achieve proteostasis through expression regulatory feed-  
321 backs, tuning of non-covalent interactions between structural subunits, and sequence re-adaptation  
322 (Ullmann et al., 1968; Gidalevitz et al., 2011; Manara et al., 2012). All of these mechanisms act in  
323 multiple levels and can have an immediate impact on substrate accommodation (Thompson et al.,  
324 1999). A single amino acid change may be crucial for the specificity between the substrate and  
325 its binding site (Gierse et al., 1996; Price and Arkin, 2022). Moreover, modification of residues at  
326 sites other than the conserved regions of the protein can often be structurally important (Sadowski  
327 and Jones, 2009). Regarding the quaternary structure, the protein subunits evolve to remain bound  
328 under physiological conditions, and to monomerize in out-of-range environments (Traut, 1994).  
329 Sometimes, due in part to the non-covalent nature of these protein-protein bonds, it is possible to  
330 recover function when physiological conditions return (Traut, 1994). For all these reasons, it can  
331 be stated that any functional protein is the fine-tuned product of a sequence to a very particular  
332 range of environmental conditions.

333 Most of the previous research has demonstrated that microbial proteins may have several  
334 adaptations to the environment (Bartlett, 1999; Rio et al., 2003; Spor et al., 2011). However, the  
335 process itself is poorly understood in a mechanistic way, despite continued efforts (Kreitman, 1996;  
336 Reed et al., 2013; Tamuri and Dos Reis, 2022). More recently, Panja et al. explored statistically  
337 how microbial proteins undergo selective changes to adapt to environments of different kinds,  
338 both in terms of amino acid composition and in their ordering (Panja et al., 2020), a result in  
339 line with the *weak selection* concept (Akashi et al., 2012). According to these and other previous  
340 results, salinity, pH and temperature would represent the major environmental drivers of how

341 implementations evolve (Lanyi, 1974; Fisher et al., 1997; Kumar et al., 2009; Tamames et al.,  
342 2010), modifying the protein catalytic kinetics, substrate specificity or conditional stability while  
343 maintaining the same function (Huston et al., 2008; Zhao, 2022).

344 These facts lead us to think that the guilds are structured differently, depending on the environ-  
345 mental circumstances. However, in the absence of a quantitative definition of guild, the study of  
346 changes in guild structure under different environmental conditions has been difficult.

### 347 **Determining microbial guild structure considering the nature of protein diversification**

348 In order to test the usefulness of the guild quantification method, we chose a function that is  
349 difficult to explore and quantify, which is organic nitrogen acquisition through putrescine and other  
350 related polyamines. The difficulty of exploring this function is given by the following pitfalls: (i)  
351 substrate affinity is moderately unspecific and, although there may be a slight preferential binding  
352 to spermidine or putrescine depending on certain amino acids (Kashiwagi et al., 1996), our results  
353 indicate that it would be difficult to discriminate between tree regions with particular specificities  
354 (Sup. Fig. F); (ii) there are several gene names for very similar protein sequences; (iii) there is an  
355 extreme shortage of curated sequences with functional experimental evidence.

356 As stated above, the microbial guild quantification method aims to (1) discriminate sequence  
357 spaces that correspond to the same function, and then to (2) characterize groups of functional  
358 sequences that work in a similar way (implementations of the function). The first objective  
359 improved automatic gene annotation, while the second categorized it functionally. To do both,  
360 we built and used several reference phylogenetic trees for oceanic organisms as sequence space  
361 classifiers (Figs. 4 and 5). For more details on how the first objective was carried out, see Methods  
362 and the Supplementary Material.

363 Regarding the second, we wanted to classify the performances of ABC transporter-associated  
364 polyamine-binding proteins. Since we did not have sufficient information on the preferential  
365 binding to each polyamine or its kinetics, we decided to characterize groups that work alike in  
366 a different way. We manually obtained environmental preference information for as many of the  
367 cultured organisms present in our reference tree as possible. Then, we tested how good the tree

368 topology was at discriminating groups of sequences putatively adapted to work in given ranges of  
369 the environmental variables.

370 When evaluating sequentially all nodes in the tree, we found that some internal nodes had  
371 a significant correspondence with particular environmental variables. These nodes divided the  
372 tree into highly paraphyletic clades containing sequences that correlate with salinity, pH, and  
373 temperature (Fig. 5). This result is consistent with the previous literature on the topic. In addition,  
374 motility was also very significant for the same group of sequences related to pH variability. One  
375 possibility would be that these environmentally consistent clades were phylogenetically close. That  
376 is, the adaptation of the functional protein to a certain environmental condition would have been  
377 vertically inherited. However, this was not the case. We found that the divergence of the bigger  
378 groups was not explained by taxonomy (Sup. Fig. D). We then defined the implementations of the  
379 function as the sequence spaces shown in Figure 5.

### 380 **Decoupling taxonomy and function**

381 We have argued above that taxonomic position is not, in many cases, synonymous with function.  
382 In addition to those arguments, there is some research actually focused on decoupling taxonomy  
383 from functional assets (Louca et al., 2016; Tamames et al., 2016). Moreover, machine learning  
384 approaches appear to outperform niche prediction with functions rather than phylogeny (Alneberg  
385 et al., 2020). This means that, at least in specific cases, it is possible to better predict the occur-  
386 rence of function in an environment by its physicochemical features rather than by the taxonomic  
387 composition detected therein (Tamames et al., 2016).

388 Our guild definition can partially avoid the latter issue, because it can be used to discriminate  
389 these taxonomic effects from those caused by functional convergence in order to dissect how the  
390 function is implemented through a battery of environments. Even if the taxonomic assignment is  
391 biased or not very predictive, it is complemented by the information from the implementations that  
392 perform the function.

393 As shown in the results section, the acquisition of putrescine-like polyamines is a ubiquitous  
394 trait in the examined ocean layers, which is consistent with previous literature on the topic (Bergauer



395 [et al., 2018](#)). However, we added novel insights about the guild changes with depth. The guild  
396 presents itself, however, in multiple forms; it changes both its taxonomic composition and the  
397 implementations mostly found, and seems to follow trends that correspond to the different physico-  
398 chemical characteristics intrinsically linked to the three analyzed zones of the ocean: bathypelagic  
399 (4000-1000m), mesopelagic (1000-200m) and epipelagic (200-0m).

400 There are characteristic guild patterns that seem to be better explained by depth than by sampling  
401 spot or latitude. Our results show that, in most cases, this function is carried out by a lot of different  
402 taxa and all types of polyamine uptake implementations. The latter effect seems to support the  
403 statement of functional redundancy being more prevalent than expected by chance in microbiomes  
404 ([Puente-Sanchez et al., 2022](#)).

405 In Bergauer's study, different metabolic traits were studied to analyze microbial heterotrophy in  
406 different ocean layers. What our approach adds is, fundamentally, three things: (1) depuration of  
407 the truly functional space, (2) discrimination between purely taxonomic effects and those that are  
408 not related to taxonomy, and (3) determination whether function responds positively by unexpected  
409 diversification of its effectors. In addition, our approach allows rapid visual comparison of the  
410 guild pattern. Finally, it makes the comparison between different guilds easier, as the ecological  
411 values are standardized by the same theoretical framework, without assuming that the importance  
412 of a function in an environment depends solely on the abundance of automatic annotated genes.

### 413 **Correction for expected richness of an implementation**

414 A correction for expected sequence richness was introduced to estimate the importance of a  
415 molecular function because of the following reasons: (i) empirically, we observed that each gene  
416 grows in richness of unique sequences differently with relative abundance, as seen in Figure 3; (ii)  
417 abundance values for lower than expected richness can be explained by the strong dominance of  
418 an organism in a particular sample, but it does not imply that this function is responsible for the  
419 ecological success of the dominant organism, so low-richness abundances will be overestimating  
420 the importance of the function; (iii) higher than expected richness should result in a higher function  
421 robustness, since the loss of fitness for the global function regarding environmental changes should



422 be reduced as the sequence space widens.

423 In other words, our model rewards versatile behaviors for the same function in an environment,  
424 inferred by the richness of its effectors, as long as  $d_{obs}$  is greater than  $d_{exp}$ . This is because we  
425 postulate that unexpected sequence diversification increases the odds that the function will persist  
426 in the environment when exposed to undefined changes. This phenomenon, although not formally  
427 described, has been proposed in a multitude of different biological systems (Wright et al., 2005;  
428 Hakes et al., 2007; Föhse et al., 2011; García-García et al., 2019).

429 For example, as can be seen in Figure 8, the fold change in  $k_{meso}$  has a similar behavior among  
430 implementations related to adaptation to plasticity in pH (*cIIa* and *cIIb*). This very noticeable  
431 increase is shown to be exclusive for this type of implementations, and can be explained by the  
432 rapid depth-dependent acidification, a characteristic feature of the mesopelagic oxycline (Park,  
433 1966; Dickson, 1993). In general, the lowest pH levels in the water column correspond with  
434 the presence of an oxygen minimum. The decrease in pH is mainly driven by the increased  
435 concentration of dissolved carbonic acid, which also relates to biological activity of upper layers  
436 (Sup. Fig. G). Values of pH are also dependent on more strictly abiotic factors such as temperature,  
437 salinity and pressure, acting as dissociation constant modifiers (Byrne et al., 1999; Ternon et al.,  
438 2001). Therefore, the pH minimum is strongly linked to mesopelagic depths and may exhibit some  
439 seasonality. So, as shown, we can relate or even anticipate complex functional dynamics in a  
440 particular ecosystem.

#### 441 **Importance of the guild concept to study microbial functions**

442 There has been increasing interest in developing metagenomic studies based on guilds. A  
443 recent approach proposes a model that identifies potential functions through patterns of variation  
444 in species abundance and ecosystem properties across microbial communities (Shan and Cordero,  
445 2023). Although we find this tool exciting and useful for identifying putative top contributors  
446 to a function in an environment, it has three shortcomings: (1) their model assumes a strict  
447 relationship between taxonomy and function (2) its usefulness strongly depends on the correlations  
448 with measurements of nutrients or substrates, which are costly and perhaps time-dependent, and

449 (3) it does not solve the existing problems in the guild definition as applied to microbes.

## 450 **CONCLUSIONS**

451 First, the original definition of guild suffers when applied to microbes, and has often been  
452 used in an intuitive way. Second, just as the genetic code is degenerate because the same amino  
453 acid can be the translation of different triplets, any protein function is also degenerate because  
454 an indefinite set of sequences can perform it. In fact, the set of sequences that can perform a  
455 specific function does not necessarily maintain a close evolutionary history. With these issues  
456 in mind, we propose a theoretical redefinition of the term guild to bring the ecology of micro-  
457 bial functions into a quantitative framework, considering its evolving nature. Furthermore, our  
458 definition of guild remains quantitative and easily applicable to all other organisms. We also de-  
459 veloped methodological procedures and bioinformatics tools to facilitate its use by the community  
460 (<https://github.com/pyubero/microguilds>).

461 Regarding the technical issues, the potential for exploring functional ecology in microorganisms  
462 has been limited by the overwhelming amount of massive and imprecise omics data. Nevertheless,  
463 we have been able to partially avoid the dilemma of "automatic functional annotation black boxes"  
464 and describe some ecological trends within a complex function and ecosystem using reference  
465 phylogenetic reconstructions as functional sequence classifiers.

466 There are four main arguments that justify the present work: (i) the original definition of guild  
467 becomes inextricably ambiguous in the microscopic realm, as there is no consensus on what is a  
468 *similar way* to exploit the same kind of resources for living beings; (ii) the emergence of omics  
469 data, involving technical biases and overwhelming information quantity; (iii) the desire to establish  
470 a universality of the term, which favors a referable use of the same by the scientific community;  
471 (iv) alternative concepts are neither quantitative nor ecologically relevant.

## 472 **MATERIALS AND METHODS.**

## 473 **Construction of the marine prokaryotic genomes database (1 in Sup. Figure A)**

474 To facilitate the construction of the gene-specific reference databases, we compiled a database  
475 of peptide sequences obtained from a collection of prokaryotic, quality-filtered genomes (MAGs  
476 and SAGs) from marine environments. Specifically, we retrieved genomes from the following  
477 databases: a) the MAR database, all 1,270 complete genomes, and 5,521 partial genomes that  
478 had the “high quality” status as described in (Klemetsen et al., 2018); b) the OceanDNA database  
479 (Nishimura and Yoshizawa, 2022), all 52,325 genomes, since they had been quality-filtered based  
480 on their completeness and degree of contamination with the formula: percent completeness - 5 ×  
481 percent-contamination ≥ 50); c) the collection compiled by (Paoli et al., 2022), which includes  
482 genomes from various origins such as TARA OCEANS (Sunagawa et al., 2015) and XORG, in this  
483 case, only genomes passing the same quality filter applied in OceanDNA were kept, amounting to  
484 a total of 26,942 additional genomes. All the genomes considered had assigned taxonomy obtained  
485 with the GTDB Toolkit (Chaumeil et al., 2020) version 2.0.0 available in their corresponding  
486 databases. Finally, all sequences were merged into a single database, reads were further quality  
487 filtered with fastp version 0.20.1, and sequence duplicates were removed with seqkit rmdud (Shen  
488 et al., 2016) version 2.0.0 using default parameters.

## 489 **Functional marker selection (2a in Sup. Figure A)**

490 The search for functional markers was carried out by means of an extensive bibliographic  
491 comparison. This methodology is based on choosing public available Hidden Markov Models  
492 (HMMs) (Vasudevan et al., 2011) for one or several genes, trying to avoid functional paralogs  
493 to maximize functional univocity. In order to choose an HMM as a guild marker, we followed  
494 the following conservative criteria: (i) the construction of the HMM must be congruent with the  
495 sequences that have reviewed functional evidence in literature, (ii) the metagenomic sequences  
496 retrieved with the tested HMM can be filtered out by a specific quality argument, derived from the  
497 inner workings of genomic architecture (i.e.: synteny) or a consequence of the evolutive history of  
498 the gene (i.e.: similar sequences that have undergone functional drift). With this methodology, we  
499 selected the best minimal markers for the guilds analyzed in this work.

## 500 **Construction of the gene-specific reference database (2b in Sup. Figure A)**

501 We used the selected profile HMMs and HMMER3 (Johnson et al., 2010) to retrieve candidate  
502 sequences of the target gene from our collected marine peptide database. Gather score thresholds  
503 were used as a quality filter when available, otherwise, a minimum E-score threshold of  $10^{-9}$  was  
504 employed.

505 To facilitate inference and later visual inspection of the phylogenetic trees, sequence hits were  
506 further filtered to set a maximum database size of N representative sequences. To this end, we  
507 applied a series of filters. First, we set minimal and maximal sequence length cutoff values of *l1* and  
508 *l2*, respectively. Second, we removed sequence duplicates through seqkit's rmdup sub-command  
509 with default parameters. Third, we applied CD-HIT (Fu et al., 2012) with default parameters to  
510 reduce redundancy in the peptide database. Finally, if the database size was larger than the allowed  
511 maximum after applying CD-HIT, we further reduced the number of representative peptides through  
512 RepSet (Libbrecht et al., 2018), an optimization-based algorithm that obtains a series of nested  
513 sets of representative peptides of decreasing size. Specifically, we selected the maximal set of  
514 representative peptides with a size lower than the established size threshold value.

## 515 **Usage of synteny during gene-specific reference database construction (2c in Sup. Figure A)**

516 In some cases, we used syntenic information to reduce uncertainty due to the potential presence  
517 of paralogs during the reference peptide database construction. To this end, we employed the  
518 Python package Pynteny (Robaina-Estévez, 2022), which facilitates synteny-aware profile, HMM-  
519 based searchers. After generating a list of synteny-complaint target-peptide matches, we followed  
520 the same protocol to reduce database size when required to meet the established reference database  
521 size threshold value.

## 522 **Inference of the gene-specific reference trees (3a in Sup. Figure A)**

523 Once the peptide reference database was constructed, we employed MUSCLE (Edgar, 2004)  
524 with default parameter values to perform a multiple sequence alignment of the reference database.  
525 Next, we used the previous alignment and IQ-TREE (Minh et al., 2020) with default parameter  
526 values to build a reference phylogenetic tree for each target gene. We determined the substitution

527 model through ModelTest (Darriba et al., 2020) by selecting the model with the highest AIC score.

### 528 **Classification of clusters within the reference phylogenetic tree (3b in Sup. Figure A)**

529 Once we have constructed the reference tree, we can now propagate functional information  
530 that corresponds to the different regions of the reference tree. In the case of *amoA*, the functional  
531 information was obtained directly from the sequences we used to build the tree, and the clusters  
532 inferred from the similarity between sequences.

533 In the case of polyamine binding reference tree, we needed other criteria to classify clusters. To  
534 check whether different clusters are associated with different environmental conditions, we carried  
535 out an extensive literature search of the environmental preferences of 321 species that matched 478  
536 leaves (41%). We assembled a curated collection of physicochemical preferences for these species  
537 that included tolerance ranges and optimal values of temperature, salinity and pH, as well as other  
538 variables such as motility (Sup. Table 1). For each internal node we calculated the average values  
539 of all its leaves. To determine whether the association with environmental variables of the cluster  
540 were significant, these node averages were compared to the distribution observed under  $2 \cdot 10^4$   
541 randomizations to obtain their z-scores. Nodes with an average value of the z-score larger than 3,  
542 i.e.  $p\text{-value} \leq 0.003$  were considered significant for the particular environmental variable (Sup.  
543 Table 2). To select the most general internal nodes, we focused on those that are significant but  
544 whose parent node is not. These are color coded in Figure 5 and Figure 6.

545 To determine whether these sequence clusters were expected by the taxonomy of the organisms,  
546 we constructed a null model of phylogenetic divergence with two ribosomal phylomarkers (16s  
547 and *rplB*). We then compared the divergence of *potF*-like sequences for the same organisms,  
548 finding that taxonomy does not explain, in most cases, the drift found in functional genes; however,  
549 environmental variables do, especially for nodes that separate more leaves on the tree, as shown in  
550 Supplementary Figure D.

551 This methodology can be applied to any type of functional evidence, not only environmental,  
552 but also kinetic, substrate preference, or any other type of evidence.

### 553 **Preprocessing of query sequences (4a in Sup. Figure A)**

554 Query sequences were retrieved from the metagenomes following SqueezeMeta's pipeline  
555 (Tamames and Puente-Sánchez, 2019).

### 556 **Placement of query sequences (4b in Sup. Figure E)**

557 To place query sequences (metagenomic output) in the reference tree, we first obtained an  
558 alignment between the query and the reference sequences with papara (Berger and Stamatakis,  
559 2012) version 2.5. Then, we placed query sequences with the tool EPA-ng (Barbera et al., 2019)  
560 version 0.3.8. Additionally, we employed the Gappa toolkit version 0.8, specifically, the command  
561 `gappa examine graft` (Czech et al., 2020) to visualize the placed sequences on the reference tree  
562 using default parameters. The phylogenetic placement tree was visualized using the Interactive  
563 Tree of Life (Letunic and Bork, 2016).

### 564 **Taxonomical and functional labeling of placed query sequences (4c in Sup. Figure A)**

565 We employed the Gappa toolkit, specifically, the command `gappa examine assign` to assign  
566 taxonomy to placed sequences. Briefly, Gappa first assigns a consensus taxonomy to each internal  
567 node of the tree and then assigns to each query sequence the closest taxonomy in the reference tree  
568 weighted by the likelihood of each placement. We employed default parameters and the `best_hit`  
569 option to retrieve only the taxonomic assignments with the highest total placement likelihood for  
570 each query. To assign functional labels to placed queries, we selected the function of the tree cluster  
571 in which each query had been placed. To this end, we first added the cluster label to each taxonomic  
572 path of the reference sequences as an additional (artificial) taxon above the domain level. In this  
573 manner, we could employ `gappa examine assign` to assign both taxonomy and the cluster label (i.e.,  
574 function) to each placed query.

### 575 **Quantification of Polyamine-uptakers guild (5 in Sup. Figure A)**

576 Once filtered sequences are classified by environment, taxon, and implementation, they are  
577 merged together with the corresponding normalized abundances into a single master table. This  
578 is the input for the first tool of our public repository (<https://github.com/pyubero/microguilds>), a

579 python module called *guild\_tensor\_generate*. The module will extract all the required information  
580 for the calculation of each implementation, taxon and environment-dependent functional contribu-  
581 tion,  $k$ . In the present case, we study three distinct environments, so the software will produce an  
582 array of dimension  $3 \times m \times l$  (where  $m$  is the number of implementations established within the  
583 guild marker, and  $l$  the number of taxa).

584 The calculation contemplates three terms. The abundance,  $a_s$ , has been calculated as a summa-  
585 tion of normalized metagenomic counts for all the sequences contained in the same implementation,  
586 taxon, and environment. The second term is  $d$ . Theoretical  $d$  is the unexpected sequence diver-  
587 sification according to the sum of  $a$ , the first term. Calculation of the theoretical  $d$  is complex  
588 and would require avoiding false negatives. Therefore, in our work it is limited by the technique  
589 of retrieving this kind of data, as shown in Figure 2. Finally, the term representing the univocity  
590 of the implementations,  $u$ , is equal to 1.0 since we discard the metagenomic sequences falling  
591 into non-functional sequence spaces of the reference tree, or false positives. In addition, we had a  
592 highly-conservative criteria to estimate the functional sequence space, as described also in methods.  
593 Ideally, environmental inhibition of the effector must be considered for the univocity calculation,  
594 but since we lack the data, we have decided that there is no inhibition for this example. An example  
595 of the  $k$ -tensor output is provided in the Supplementary Table 3.

596 The second tool, *guild\_tensor\_visualize*, helps to visualize this tensor, which can be of varying  
597 complexity. It does two things: (i) it filters by the taxonomic level to visualize the guild patterns  
598 and (ii) it takes the value of  $k$  by taxonomic contribution to each implementation and environment.  
599 To do the latter, it takes the contribution of each position in the tensor and plot them with different  
600 preferences (*top contributors* or *rare taxa*, *linear* or *log* representation, *polar* or *rectilinear* charting,  
601 etc.) as shown in Fig. 7, resulting in an easy way to visualize complex data.

## 602 **16S and rplB sequences**

603 To screen phylogenetic deviations between functions and phylomarkers (Sup. Fig. D), we  
604 obtained the nucleotide sequences of the 16S ribosomal subunit and the *rplB* gene from the  
605 assembly genomic RNA and CDS provided by the NCBI for 319 out of the 321 species found in



606 pure culture. When 16S sequences were < 1000bp, we used instead sequences from other strains  
607 as they should remain well conserved within the same species. All RefSeq assembly accession  
608 numbers and alternative GIs for 16S data were automatically retrieved from the NCBI, a detailed  
609 list is available in the Supplementary Table 4.

## 610 **AKCNOWLEDGEMENTS**

611 We are grateful to Juan F. Poyatos (CNB-CSIC) for discussion of the methodologies and their  
612 implications, and to Alberto Pascual-García (CNB-CSIC) for the feedback and discussion on the  
613 epistemology of the microbial guild. We also thank the CSIC-LifeHUB forum (PIE-202120E047-  
614 Conexiones-Life) for generating space for discussion and allowing these ideas to mature.

## 615 **AUTHOR CONTRIBUTIONS**

616 J.R.S.: Conceptualization, Methodology, Validation, Writing - Original Draft, Investigation,  
617 Data curation, Visualization; P.Y.: Methodology, Software, Formal analysis, Writing - Review &  
618 Editing, Data curation, Visualization; S.R.E.: Methodology, Writing - Review & Editing; J.M.G.:  
619 Methodology; J.T. and C.P.A.: Writing - Review & Editing, Project administration, Supervision,  
620 Funding acquisition.

## 621 **FUNDING**

622 Project PID2019-110011RB-C31 funded by MCIN/AEI/10.13039/501100011033 and work  
623 supported by Ph.D. fellowship PRE2020-096130 from the Spanish Ministerio de Ciencia e Inno-  
624 vación and the European Social Fund.

## 625 **COMPETING INTERESTS**

626 The authors declare no competing interests.

## 627 **MATERIALS AND CORRESPONDENCE**

628 Correspondence and request for materials should be addressed to J.R.S.

## 629 **REFERENCES**



- 630 Akashi, H., Osada, N., and Ohta, T. (2012). “Weak selection and protein evolution.” *Genetics*,  
631 192(1), 15–31.
- 632 Alam, M. S., Garg, S. K., and Agrawal, P. (2009). “Studies on structural and functional divergence  
633 among seven *whiB* proteins of *Mycobacterium tuberculosis* h37rv.” *The FEBS journal*, 276(1),  
634 76–93.
- 635 Alneberg, J., Bennke, C., Beier, S., Bunse, C., Quince, C., Ininbergs, K., Riemann, L., Ekman,  
636 M., Jürgens, K., Labrenz, M., et al. (2020). “Ecosystem-wide metagenomic binning enables  
637 prediction of ecological niches from genomes.” *Communications biology*, 3(1), 1–10.
- 638 Altenhoff, A. M. and Dessimoz, C. (2012). “Inferring orthology and paralogy.” *Evolutionary  
639 genomics*, 259–279.
- 640 Alves, R. J. E., Minh, B. Q., Urich, T., von Haeseler, A., and Schleper, C. (2018). “Unifying the  
641 global phylogeny and environmental distribution of ammonia-oxidising archaea based on *amoA*  
642 genes.” *Nature communications*, 9(1), 1517.
- 643 Arrigo, K. R. (2005). “Marine microorganisms and global nutrient cycles.” *Nature*, 437(7057),  
644 349–355.
- 645 Baiser, B. and Lockwood, J. L. (2011). “The relationship between functional and taxonomic  
646 homogenization.” *Global Ecology and Biogeography*, 20(1), 134–144.
- 647 Barbera, P., Kozlov, A. M., Czech, L., Morel, B., Darriba, D., Flouri, T., and Stamatakis, A. (2019).  
648 “EPA-ng: massively parallel evolutionary placement of genetic sequences.” *Systematic biology*,  
649 68(2), 365–369.
- 650 Bartlett, D. H. (1999). “Microbial adaptations to the psychrosphere/piezosphere.” *Journal of  
651 molecular microbiology and biotechnology*, 1(1), 93–100.
- 652 Bergauer, K., Fernandez-Guerra, A., Garcia, J. A., Sprenger, R. R., Stepanauskas, R., Pachiadaki,  
653 M. G., Jensen, O. N., and Herndl, G. J. (2018). “Organic matter processing by microbial

- 654 communities throughout the Atlantic water column as revealed by metaproteomics.” *Proceedings*  
655 *of the National Academy of Sciences*, 115(3), E400–E408.
- 656 Berger, S. A. and Stamatakis, A. (2012). “Papara 2.0: a vectorized algorithm for probabilistic  
657 phylogeny-aware alignment extension.” *Heidelberg Institute for Theoretical Studies*, 12.
- 658 Byrne, R. H., McElligott, S., Feely, R., and Millero, F. (1999). “The role of pHT measurements  
659 in marine CO<sub>2</sub>-system characterizations.” *Deep Sea Research Part I: Oceanographic Research*  
660 *Papers*, 46(11), 1985–1997.
- 661 Cavalier-Smith, T. (2006). “Cell evolution and earth history: stasis and revolution.” *Philosophical*  
662 *Transactions of the Royal Society B: Biological Sciences*, 361(1470), 969–1006.
- 663 Cech, T. (2009). “Evolution of biological catalysis: ribozyme to RNP enzyme.” *Cold Spring*  
664 *Harbor symposia on quantitative biology*, Vol. 74, Cold Spring Harbor Laboratory Press, 11–16.
- 665 Chaumeil, P.-A., Mussig, A. J., Hugenholtz, P., and Parks, D. H. (2020). “GTDB-Tk: a toolkit to  
666 classify genomes with the Genome Taxonomy Database.” *Bioinformatics*, 36(6), 1925–1927.
- 667 Chiel, H. J. and Beer, R. D. (1997). “The brain has a body: adaptive behavior emerges from  
668 interactions of nervous system, body and environment.” *Trends in neurosciences*, 20(12), 553–  
669 557.
- 670 Czech, L., Barbera, P., and Stamatakis, A. (2020). “Genesis and gappa: processing, analyzing and  
671 visualizing phylogenetic (placement) data.” *Bioinformatics*, 36(10), 3263–3265.
- 672 Darriba, D., Posada, D., Kozlov, A. M., Stamatakis, A., Morel, B., and Flouri, T. (2020).  
673 “ModelTest-NG: a new and scalable tool for the selection of DNA and protein evolutionary models.”  
674 *Molecular biology and evolution*, 37(1), 291–294.
- 675 Deng, C., Cheng, C.-H. C., Ye, H., He, X., and Chen, L. (2010). “Evolution of an antifreeze  
676 protein by neofunctionalization under escape from adaptive conflict.” *Proceedings of the National*  
677 *Academy of Sciences*, 107(50), 21593–21598.

- 678 Dickson, A. G. (1993). “The measurement of sea water ph.” *Marine chemistry*, 44(2-4), 131–142.
- 679 Dourado, H., Mori, M., Hwa, T., and Lercher, M. J. (2021). “On the optimality of the enzyme–  
680 substrate relationship in bacteria.” *PLoS biology*, 19(10), e3001416.
- 681 Edgar, R. C. (2004). “MUSCLE: a multiple sequence alignment method with reduced time and  
682 space complexity.” *BMC bioinformatics*, 5(1), 1–19.
- 683 Ensign, S. A., Hyman, M. R., and Arp, D. J. (1993). “In vitro activation of ammonia monooxygenase  
684 from *Nitrosomonas europaea* by copper.” *Journal of bacteriology*, 175(7), 1971–1980.
- 685 Fauth, J., Bernardo, J., Camara, M., Resetarits Jr, W., Van Buskirk, J., and McCollum, S. (1996).  
686 “Simplifying the jargon of community ecology: a conceptual approach.” *The American Natu-  
687 ralist*, 147(2), 282–286.
- 688 Fay, J. C. and Wu, C.-I. (2003). “Sequence divergence, functional constraint, and selection in  
689 protein evolution.” *Annual review of genomics and human genetics*, 4(1), 213–235.
- 690 Fisher, M., Gokhman, I., Pick, U., and Zamir, A. (1997). “A structurally novel transferrin-like  
691 protein accumulates in the plasma membrane of the unicellular green alga *dunaliella salina*  
692 grown in high salinities.” *Journal of biological chemistry*, 272(3), 1565–1570.
- 693 Föhse, L., Suffner, J., Suhre, K., Wahl, B., Lindner, C., Lee, C.-W., Schmitz, S., Haas, J. D.,  
694 Lamprecht, S., Koenecke, C., et al. (2011). “High TCR diversity ensures optimal function  
695 and homeostasis of Foxp3+ regulatory T cells.” *European journal of immunology*, 41(11), 3101–  
696 3113.
- 697 Fu, L., Niu, B., Zhu, Z., Wu, S., and Li, W. (2012). “CD-HIT: accelerated for clustering the  
698 next-generation sequencing data.” *Bioinformatics*, 28(23), 3150–3152.
- 699 García-García, N., Tamames, J., Linz, A. M., Pedrós-Alió, C., and Puente-Sánchez, F. (2019).  
700 “Microdiversity ensures the maintenance of functional microbial communities under changing  
701 environmental conditions.” *The ISME journal*, 13(12), 2969–2983.

- 702     Gidalevitz, T., Prahlad, V., and Morimoto, R. I. (2011). “The stress of protein misfolding: from  
703     single cells to multicellular organisms.” *Cold Spring Harbor perspectives in biology*, 3(6),  
704     a009704.
- 705     Gierse, J. K., McDonald, J. J., Hauser, S. D., Rangwala, S. H., Koboldt, C. M., and Seibert, K.  
706     (1996). “A single amino acid difference between cyclooxygenase-1 (COX-1) and- 2 (COX-2)  
707     reverses the selectivity of COX-2 specific inhibitors.” *Journal of Biological Chemistry*, 271(26),  
708     15810–15814.
- 709     Glasner, M. E., Truong, D. P., and Morse, B. C. (2020). “How enzyme promiscuity and horizontal  
710     gene transfer contribute to metabolic innovation.” *The FEBS journal*, 287(7), 1323–1342.
- 711     Gregory, T. R. (2005). “Genome size evolution in animals.” *The evolution of the genome*, Elsevier,  
712     3–87.
- 713     Gregory, T. R. and DeSalle, R. (2005). “Comparative genomics in prokaryotes.” *The evolution of*  
714     *the genome*, Elsevier, 585–675.
- 715     Hakes, L., Lovell, S. C., Oliver, S. G., and Robertson, D. L. (2007). “Specificity in protein  
716     interactions and its relationship with sequence diversity and coevolution.” *Proceedings of the*  
717     *National Academy of Sciences*, 104(19), 7999–8004.
- 718     Hillis, T. L. and Mallory, F. F. (1996). “Sexual dimorphism in wolves (*Canis lupus*) of the  
719     Keewatin District, Northwest territories, Canada.” *Canadian Journal of Zoology*, 74(4), 721–  
720     725.
- 721     Hohberg, K. (2003). “Soil nematode fauna of afforested mine sites: genera distribution, trophic  
722     structure and functional guilds.” *Applied Soil Ecology*, 22(2), 113–126.
- 723     Hult, K. and Berglund, P. (2007). “Enzyme promiscuity: mechanism and applications.” *Trends in*  
724     *biotechnology*, 25(5), 231–238.

- 725 Husnik, F. and McCutcheon, J. P. (2018). “Functional horizontal gene transfer from bacteria to  
726 eukaryotes.” *Nature Reviews Microbiology*, 16(2), 67–79.
- 727 Huston, A. L., Haeggström, J. Z., and Feller, G. (2008). “Cold adaptation of enzymes: Struc-  
728 tural, kinetic and microcalorimetric characterizations of an aminopeptidase from the Arctic  
729 psychrophile *Colwellia psychrerythraea* and of human leukotriene a4 hydrolase.” *Biochimica et*  
730 *Biophysica Acta (BBA)-Proteins and Proteomics*, 1784(11), 1865–1872.
- 731 Johansson, H. E., Johansson, M. K., Wong, A. C., Armstrong, E. S., Peterson, E. J., Grant, R. E.,  
732 Roy, M. A., Reddington, M. V., and Cook, R. M. (2011). “Bti1, an azoreductase with ph-  
733 dependent substrate specificity.” *Applied and environmental microbiology*, 77(12), 4223–4225.
- 734 Johnson, L. S., Eddy, S. R., and Portugaly, E. (2010). “Hidden markov model speed heuristic and  
735 iterative HMM search procedure.” *BMC bioinformatics*, 11(1), 1–8.
- 736 Jones, C. M., Spor, A., Brennan, F. P., Breuil, M.-C., Bru, D., Lemanceau, P., Griffiths, B.,  
737 Hallin, S., and Philippot, L. (2014). “Recently identified microbial guild mediates soil N<sub>2</sub>O sink  
738 capacity.” *Nature Climate Change*, 4(9), 801–805.
- 739 Kashiwagi, K., Pistocchi, R., Shibuya, S., Sugiyama, S., Morikawa, K., and Igarashi, K. (1996).  
740 “Spermidine-preferential uptake system in *Escherichia coli*. identification of amino acids involved  
741 in polyamine binding in PotD protein.” *Journal of Biological Chemistry*, 271(21), 12205–12208.
- 742 Khadka, R., Clothier, L., Wang, L., Lim, C. K., Klotz, M. G., and Dunfield, P. F. (2018). “Evolu-  
743 tionary history of copper membrane monooxygenases.” *Frontiers in microbiology*, 9, 2493.
- 744 Kimura, M. (1991). “The neutral theory of molecular evolution: a review of recent evidence.” *The*  
745 *Japanese Journal of Genetics*, 66(4), 367–386.
- 746 Klemetsen, T., Raknes, I. A., Fu, J., Agafonov, A., Balasundaram, S. V., Tartari, G., Robertsen,  
747 E., and Willassen, N. P. (2018). “The MAR databases: development and implementation of  
748 databases specific for marine metagenomics.” *Nucleic acids research*, 46(D1), D692–D699.

- 749 Koran, M. and Kropil, R. (2014). “What are ecological guilds? dilemma of guild concepts.”  
750 *Russian Journal of Ecology*, 45(5), 445.
- 751 Koskella, B., Hall, L. J., and Metcalf, C. J. E. (2017). “The microbiome beyond the horizon of  
752 ecological and evolutionary theory.” *Nature ecology & evolution*, 1(11), 1606–1615.
- 753 Kreitman, M. (1996). “The neutral theory is dead. Long live the neutral theory.” *Bioessays*, 18(8),  
754 678–683.
- 755 Kumar, S., Singh, S. K., and Gromiha, M. M. (2009). “Temperature-dependent molecular adapta-  
756 tions, microbial proteins.” *Encyclopedia of industrial biotechnology: bioprocess, bioseparation,*  
757 *and cell technology*, 1–22.
- 758 Ladero, M., Ruiz, G., Pessela, B., Vian, A., Santos, A., and Garcia-Ochoa, F. (2006). “Thermal  
759 and pH inactivation of an immobilized thermostable  $\beta$ -galactosidase from *thermus* sp. strain t2:  
760 Comparison to the free enzyme.” *Biochemical Engineering Journal*, 31(1), 14–24.
- 761 Lanyi, J. K. (1974). “Salt-dependent properties of proteins from extremely halophilic bacteria.”  
762 *Bacteriological reviews*, 38(3), 272–290.
- 763 Lau, E., Lukich, D., and Le, T. (2016). “The evolution of the *amoA*, *pmoA* and *bmoA* genes  
764 measured by  $k_a/k_s$  ratios.” *Proceedings of the West Virginia Academy of Science*, 88(1).
- 765 Letunic, I. and Bork, P. (2016). “Interactive tree of life (iTOL) v3: an online tool for the display  
766 and annotation of phylogenetic and other trees.” *Nucleic acids research*, 44(W1), W242–W245.
- 767 Libbrecht, M. W., Bilmes, J. A., and Noble, W. S. (2018). “Choosing non-redundant representative  
768 subsets of protein sequence data sets using submodular optimization.” *Proteins: Structure,*  
769 *Function, and Bioinformatics*, 86(4), 454–466.
- 770 Liberles, D. A., Teichmann, S. A., Bahar, I., Bastolla, U., Bloom, J., Bornberg-Bauer, E., Colwell,  
771 L. J., De Koning, A. J., Dokholyan, N. V., Echave, J., et al. (2012). “The interface of protein  
772 structure, protein biophysics, and molecular evolution.” *Protein Science*, 21(6), 769–785.

- 773 Louca, S., Parfrey, L. W., and Doebeli, M. (2016). “Decoupling function and taxonomy in the  
774 global ocean microbiome.” *Science*, 353(6305), 1272–1277.
- 775 Lynch, M., Ackerman, M. S., Gout, J.-F., Long, H., Sung, W., Thomas, W. K., and Foster, P. L.  
776 (2016). “Genetic drift, selection and the evolution of the mutation rate.” *Nature Reviews Genetics*,  
777 17(11), 704–714.
- 778 Manara, A., DalCorso, G., Baliardini, C., Farinati, S., Cecconi, D., and Furini, A. (2012). “*Pseu-*  
779 *domonas putida* response to cadmium: changes in membrane and cytosolic proteomes.” *Journal*  
780 *of proteome research*, 11(8), 4169–4179.
- 781 Martens-Habbena, W., Berube, P. M., Urakawa, H., de La Torre, J. R., and Stahl, D. A. (2009).  
782 “Ammonia oxidation kinetics determine niche separation of nitrifying archaea and bacteria.”  
783 *Nature*, 461(7266), 976–979.
- 784 Martinović, T., Odriozola, I., Mašínová, T., Doreen Bahmann, B., Kohout, P., Sedlák, P., Merunk-  
785 ová, K., Větrovský, T., Tomšovský, M., Ovaskainen, O., et al. (2021). “Temporal turnover of the  
786 soil microbiome composition is guild-specific.” *Ecology Letters*, 24(12), 2726–2738.
- 787 Masel, J. (2011). “Genetic drift.” *Current Biology*, 21(20), R837–R838.
- 788 Minh, B. Q., Schmidt, H. A., Chernomor, O., Schrempf, D., Woodhams, M. D., Von Haeseler,  
789 A., and Lanfear, R. (2020). “IQ-TREE 2: new models and efficient methods for phylogenetic  
790 inference in the genomic era.” *Molecular biology and evolution*, 37(5), 1530–1534.
- 791 Moreno-Ulloa, A., Sicairos Diaz, V., Tejeda-Mora, J. A., Macias Contreras, M. I., Castillo, F. D.,  
792 Guerrero, A., Gonzalez Sanchez, R., Mendoza-Porras, O., Vazquez Duhalt, R., and Licea-  
793 Navarro, A. (2020). “Chemical profiling provides insights into the metabolic machinery of  
794 hydrocarbon-degrading deep-sea microbes.” *Msystems*, 5(6), 10–1128.
- 795 Nebel, S., Mills, A., McCracken, J., and Taylor, P. (2010). “Declines of aerial insectivores in north  
796 america follow a geographic gradient.” *Avian Conservation and Ecology*, 5(2).



- 797 Nemergut, D. R., Schmidt, S. K., Fukami, T., O'Neill, S. P., Bilinski, T. M., Stanish, L. F., Knelman,  
798 J. E., Darcy, J. L., Lynch, R. C., Wickey, P., et al. (2013). "Patterns and processes of microbial  
799 community assembly." *Microbiology and Molecular Biology Reviews*, 77(3), 342–356.
- 800 Nishimura, Y. and Yoshizawa, S. (2022). "The OceanDNA MAG catalog contains over 50,000  
801 prokaryotic genomes originated from various marine environments." *Scientific Data*, 9(1), 305.
- 802 Offre, P., Kerou, M., Spang, A., and Schleper, C. (2014). "Variability of the transporter gene  
803 complement in ammonia-oxidizing archaea." *Trends in microbiology*, 22(12), 665–675.
- 804 Oudova-Rivera, B., Wright, C. L., Crombie, A. T., Murrell, J. C., and Lehtovirta-Morley, L. E.  
805 (2023). "The effect of methane and methanol on the terrestrial ammonia oxidising archaeon  
806 '*Candidatus Nitrosocosmicus franklandus* c13'." *Environmental Microbiology*.
- 807 Pagé, A., Tivey, M. K., Stakes, D. S., and Reysenbach, A.-L. (2008). "Temporal and spatial archaeal  
808 colonization of hydrothermal vent deposits." *Environmental Microbiology*, 10(4), 874–884.
- 809 Panja, A. S., Maiti, S., and Bandyopadhyay, B. (2020). "Protein stability governed by its structural  
810 plasticity is inferred by physicochemical factors and salt bridges." *Scientific reports*, 10(1), 1–9.
- 811 Paoli, L., Ruscheweyh, H.-J., Forneris, C. C., Hubrich, F., Kautsar, S., Bhushan, A., Lotti, A.,  
812 Clayssen, Q., Salazar, G., Milanese, A., et al. (2022). "Biosynthetic potential of the global ocean  
813 microbiome." *Nature*, 607(7917), 111–118.
- 814 Park, K. (1966). "Deep-sea pH." *Science*, 154(3756), 1540–1542.
- 815 Pascual-García, A., Abia, D., Méndez, R., Nido, G. S., and Bastolla, U. (2010). "Quantifying  
816 the evolutionary divergence of protein structures: the role of function change and function  
817 conservation." *Proteins: Structure, Function, and Bioinformatics*, 78(1), 181–196.
- 818 Passy, S. I. (2007). "Diatom ecological guilds display distinct and predictable behavior along  
819 nutrient and disturbance gradients in running waters." *Aquatic botany*, 86(2), 171–178.



- 820 Pedrós-Alió, C. (1989). “Toward an autecology of bacterioplankton.” *Plankton Ecology*, Springer,  
821 297–336.
- 822 Pistocchi, R., Kashiwagi, K., Miyamoto, S., Nukui, E., Sadakata, Y., Kobayashi, H., and Igarashi, K.  
823 (1993). “Characteristics of the operon for a putrescine transport system that maps at 19 minutes  
824 on the *Escherichia coli* chromosome.” *Journal of Biological Chemistry*, 268(1), 146–152.
- 825 Price, M. N. and Arkin, A. P. (2022). “Interactive analysis of functional residues in protein families.”  
826 *Msystems*, e00705–22.
- 827 Puente-Sanchez, F., Pascual-Garcia, A., Bastolla, U., Pedros-Alio, C., and Tamames, J. (2022).  
828 “Cross-biome microbial networks reveal functional redundancy and suggest genome reduction  
829 through functional complementarity.” *bioRxiv*.
- 830 Reed, C. J., Lewis, H., Trejo, E., Winston, V., and Evilia, C. (2013). “Protein adaptations in  
831 archaeal extremophiles.” *Archaea*, 2013.
- 832 Rio, R. V., Lefevre, C., Heddi, A., and Aksoy, S. (2003). “Comparative genomics of insect-  
833 symbiotic bacteria: influence of host environment on microbial genome composition.” *Applied  
834 and Environmental Microbiology*, 69(11), 6825–6832.
- 835 Robaina-Estévez, S. (2022). “Pynteny: Synteny-aware hmm searches made easy.” *Zenodo*.
- 836 Rochman, F. F., Kwon, M., Khadka, R., Tamas, I., Lopez-Jauregui, A. A., Sheremet, A.,  
837 V. Smirnova, A., Malmstrom, R. R., Yoon, S., Woyke, T., et al. (2020). “Novel copper-containing  
838 membrane monooxygenases (CuMMOs) encoded by alkane-utilizing Betaproteobacteria.” *The  
839 ISME journal*, 14(3), 714–726.
- 840 Root, R. B. (1967). “The niche exploitation pattern of the blue-gray gnatcatcher.” *Ecological  
841 monographs*, 37(4), 317–350.
- 842 Rothauwe, J.-H., Witzel, K.-P., and Liesack, W. (1997). “The ammonia monooxygenase structural

- 843 gene *amoA* as a functional marker: molecular fine-scale analysis of natural ammonia-oxidizing  
844 populations.” *Applied and environmental microbiology*, 63(12), 4704–4712.
- 845 Ruelens, P., Wynands, T., and de Visser, J. A. G. (2023). “Interaction between mutation type and  
846 gene pleiotropy drives parallel evolution in the laboratory.” *Philosophical Transactions of the  
847 Royal Society B*, 378(1877), 20220051.
- 848 Sadowski, M. and Jones, D. (2009). “The sequence–structure relationship and protein function  
849 prediction.” *Current opinion in structural biology*, 19(3), 357–362.
- 850 Sayavedra-Soto, L. A., Hamamura, N., Liu, C.-W., Kimbrel, J. A., Chang, J. H., and Arp, D. J.  
851 (2011). “The membrane-associated monooxygenase in the butane-oxidizing gram-positive bac-  
852 terium nocardioides sp. strain cf8 is a novel member of the amo/pmo family.” *Environmental  
853 microbiology reports*, 3(3), 390–396.
- 854 Shan, X. and Cordero, O. X. (2023). “Identifying microbial guilds on the basis of ecological  
855 patterns.” *Nature Ecology & Evolution*.
- 856 Shen, W., Le, S., Li, Y., and Hu, F. (2016). “SeqKit: a cross-platform and ultrafast toolkit for  
857 FASTA/Q file manipulation.” *PloS one*, 11(10), e0163962.
- 858 Soria, P. S., McGary, K. L., and Rokas, A. (2014). “Functional divergence for every paralog.”  
859 *Molecular biology and evolution*, 31(4), 984–992.
- 860 Spor, A., Koren, O., and Ley, R. (2011). “Unravelling the effects of the environment and host  
861 genotype on the gut microbiome.” *Nature Reviews Microbiology*, 9(4), 279–290.
- 862 Storz, J. F. (2016). “Causes of molecular convergence and parallelism in protein evolution.” *Nature  
863 Reviews Genetics*, 17(4), 239–250.
- 864 Stüeken, E. E., Catling, D. C., and Buick, R. (2012). “Contributions to late archaean sulphur  
865 cycling by life on land.” *Nature Geoscience*, 5(10), 722–725.

- 866 Sunagawa, S., Coelho, L. P., Chaffron, S., Kultima, J. R., Labadie, K., Salazar, G., Djahanschiri,  
867 B., Zeller, G., Mende, D. R., Alberti, A., et al. (2015). “Structure and function of the global  
868 ocean microbiome.” *Science*, 348(6237), 1261359.
- 869 Tamames, J., Abellán, J. J., Pignatelli, M., Camacho, A., and Moya, A. (2010). “Environmental  
870 distribution of prokaryotic taxa.” *BMC microbiology*, 10(1), 1–14.
- 871 Tamames, J. and Puente-Sánchez, F. (2019). “Squeezemeta, a highly portable, fully automatic  
872 metagenomic analysis pipeline.” *Frontiers in microbiology*, 9, 3349.
- 873 Tamames, J., Sánchez, P. D., Nikel, P. I., and Pedrós-Alió, C. (2016). “Quantifying the relative  
874 importance of phylogeny and environmental preferences as drivers of gene content in prokaryotic  
875 microorganisms.” *Frontiers in microbiology*, 7, 433.
- 876 Tamuri, A. U. and Dos Reis, M. (2022). “A mutation–selection model of protein evolution under  
877 persistent positive selection.” *Molecular Biology and Evolution*, 39(1), 309.
- 878 Ternon, J.-F., Oudot, C., Gourlaouen, V., and Diverres, D. (2001). “The determination of pHT in  
879 the equatorial atlantic ocean and its role in the sound absorption modeling in seawater.” *Journal  
880 of marine systems*, 30(1-2), 67–87.
- 881 Thompson, J., Reese-Wagoner, A., and Banaszak, L. (1999). “Liver fatty acid binding protein:  
882 species variation and the accommodation of different ligands.” *Biochimica et Biophysica Acta  
883 (BBA)-Molecular and Cell Biology of Lipids*, 1441(2-3), 117–130.
- 884 Tikhonov, M. (2017). “Theoretical microbial ecology without species.” *Physical Review E*, 96(3),  
885 032410.
- 886 Torsvik, V. and Øvreås, L. (2002). “Microbial diversity and function in soil: from genes to  
887 ecosystems.” *Current opinion in microbiology*, 5(3), 240–245.
- 888 Traut, T. W. (1994). “Dissociation of enzyme oligomers: a mechanism for allosteric regulation.”  
889 *Critical reviews in biochemistry and molecular biology*, 29(2), 125–163.

- 890 Ullmann, A., Jacob, F., and Monod, J. (1968). “On the subunit structure of wild-type versus  
891 complemented  $\beta$ -galactosidase of *Escherichia coli*.” *Journal of molecular biology*, 32(1), 1–13.
- 892 Valencia, A. (2005). “Automatic annotation of protein function.” *Current opinion in structural  
893 biology*, 15(3), 267–274.
- 894 van de Guchte, M. (2017). “Horizontal gene transfer and ecosystem function dynamics.” *Trends in  
895 microbiology*, 25(9), 699–700.
- 896 Vasudevan, S., Vinayaka, C., Natale, D. A., Huang, H., Kahsay, R. Y., and Wu, C. H. (2011).  
897 “Structure-guided rule-based annotation of protein functional sites in UniProt knowledgebase.”  
898 91–105.
- 899 Veshareh, M. J. and Nick, H. M. (2021). “A novel relationship for the maximum specific growth  
900 rate of a microbial guild.” *FEMS Microbiology Letters*, 368(12), 064.
- 901 Ward, B. (1987). “Kinetic studies on ammonia and methane oxidation by *Nitrosococcus oceanus*.”  
902 *Archives of Microbiology*, 147, 126–133.
- 903 Wright, C. F., Teichmann, S. A., Clarke, J., and Dobson, C. M. (2005). “The importance of  
904 sequence diversity in the aggregation and evolution of proteins.” *Nature*, 438(7069), 878–881.
- 905 Wright, C. L., Schatteman, A., Crombie, A. T., Murrell, J. C., and Lehtovirta-Morley, L. E. (2020).  
906 “Inhibition of ammonia monooxygenase from ammonia-oxidizing archaea by linear and aromatic  
907 alkynes.” *Applied and environmental microbiology*, 86(9), e02388–19.
- 908 Wu, G., Zhao, N., Zhang, C., Lam, Y. Y., and Zhao, L. (2021). “Guild-based analysis for  
909 understanding gut microbiome in human health and diseases.” *Genome medicine*, 13(1), 1–12.
- 910 Zaks, A. and Klibanov, A. M. (1986). “Substrate specificity of enzymes in organic solvents vs.  
911 water is reversed.” *Journal of the American Chemical Society*, 108(10), 2767–2768.
- 912 Zhao, Q. (2022). “Molecular and thermodynamic mechanisms for protein adaptation.” *European  
913 Biophysics Journal*, 51(7-8), 519–534.

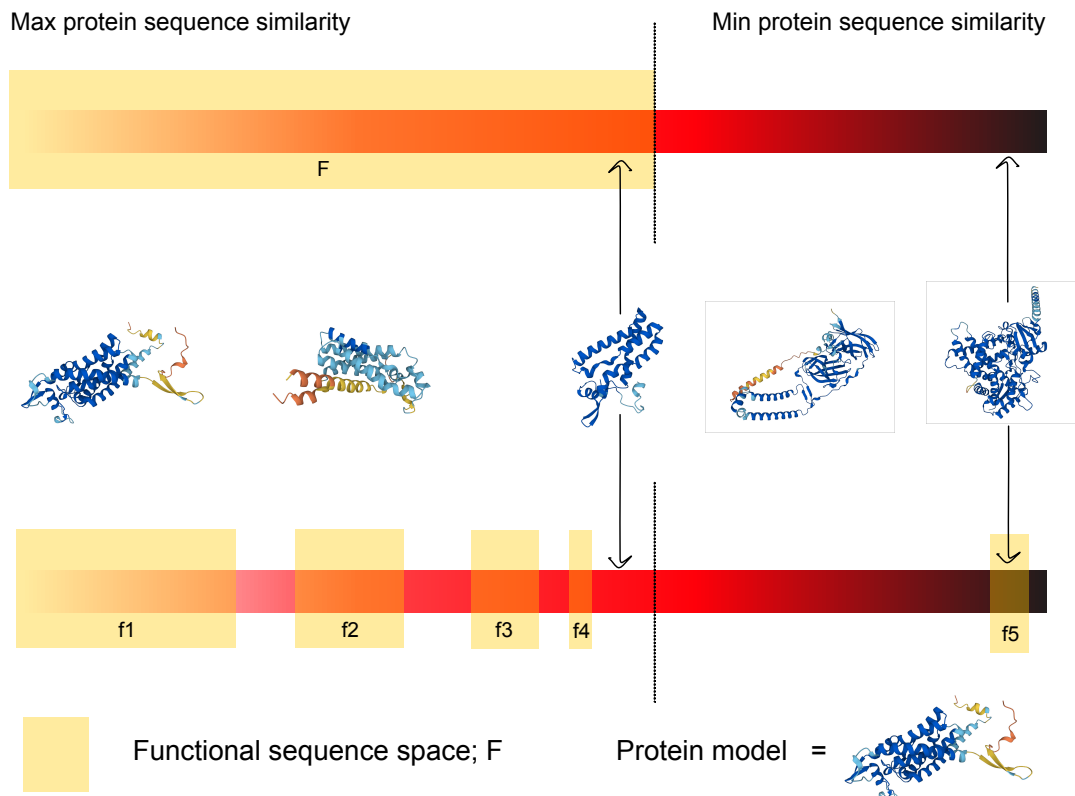

**Figure 1. Sequence spaces representing protein dissimilarity and function.** A particular function can be performed by a plethora of different protein sequences, generated by adaptive evolution and drift. The traditional models for assigning function to the reconstructed genomic data are based solely on protein sequence similarity. The models automatically annotate as functional proteins those below a certain threshold and discards all those beyond the threshold (above). Although the threshold can be adjusted, nature seems to fit better the theoretical model below, which considers three casuistries: (i) the threshold value is prone to errors, (ii) the functional space may display discontinuities or gaps, and (iii) proteins beyond the dissimilarity threshold may be able to perform the function (f5).

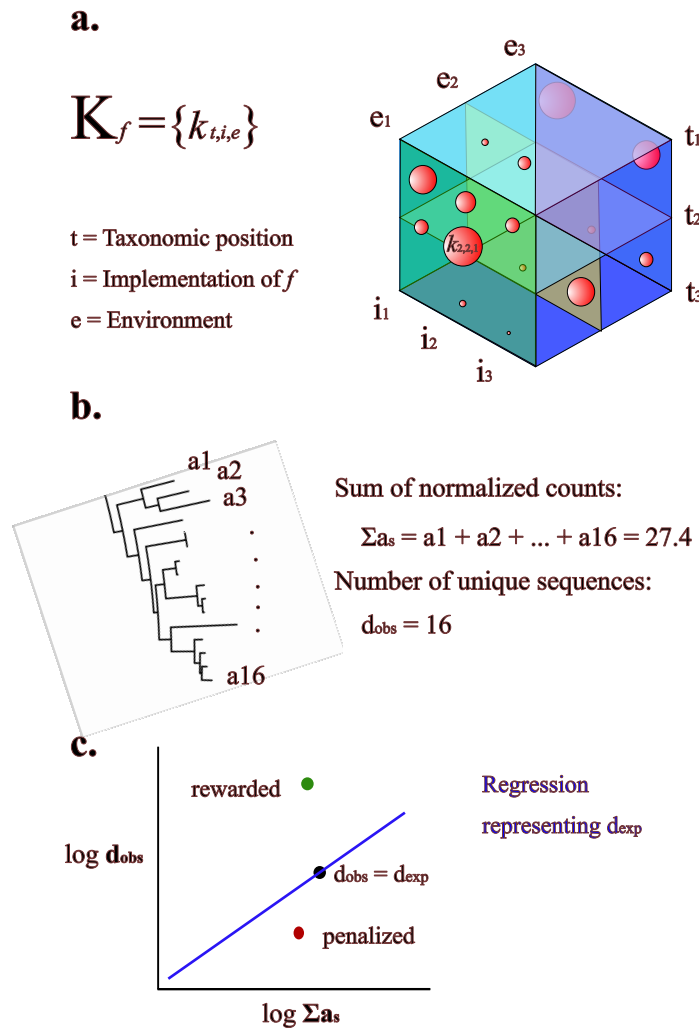

**Figure 2. Quantification of guilds: mock example of  $k$  calculation.** **a.** Visual concept of the three-dimensional object that quantifies the importance of the guild in different contexts. The guild structure can be defined as each of the impact coefficients  $k$  that the definitory function has on each triplet taxon, implementation, and environment ( $k_{t,i,e}$ ). **b.** Mock example of sequence abundance and observed diversity calculation. To calculate  $k$ , we need to sum up all the corresponding sequence abundances at a particular position (taxon, implementation, environment). We also compute  $d_{obs}$  as the count of the unique sequences found in that position (a1 to a16 in this case). **c.** To calculate  $k$ , we need to correct the sequence abundances by the sequence diversification expected from abundance. This expected richness is calculated from log-log regression. Thus, values of  $k$  reward sequence diversities higher than expected for an abundance value (when  $d_{obs} > d_{exp}$ ), and penalize them otherwise. The empirical model is based on all observations of a gene in our database.

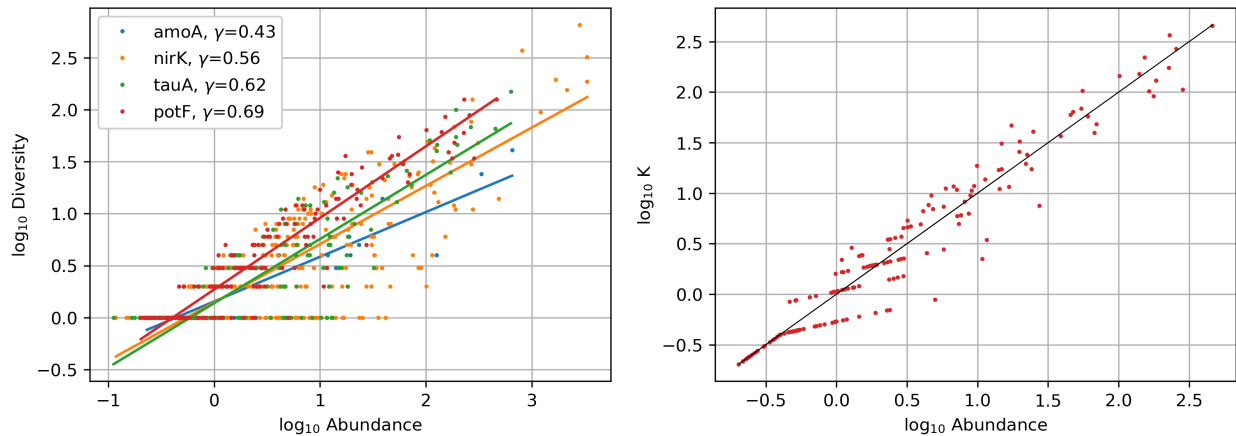

**Figure 3. Practical  $k$  calculation with metagenomic data. a.** Log-log regression of observed diversity and abundance in four different genes (function markers). In attempting to compare the sum of abundance for a taxon, environment, and implementation with its unique sequence richness, we expected an evident relationship. And certainly, most cases appear to follow a logarithmic trend. However, we found that (i) sometimes there are abundance values that do not predict the observed sequence richness (ii) although the r-squared values of the regression are very consistent (mean of  $\approx 0.8$ ), the slope seems characteristic of each gene. This translates as, apparently, each gene grows in sequence richness ( $\gamma$ ) differently with abundance. **b.** Example of how the value of  $k$  changes with the value of the sum of abundances in *potF* gene. We use this empirical model to estimate the expected diversity for a given abundance, so we can positively weight which abundances are richer in unique sequences. Conversely, this model penalizes abundances that have lower than expected sequence diversity.

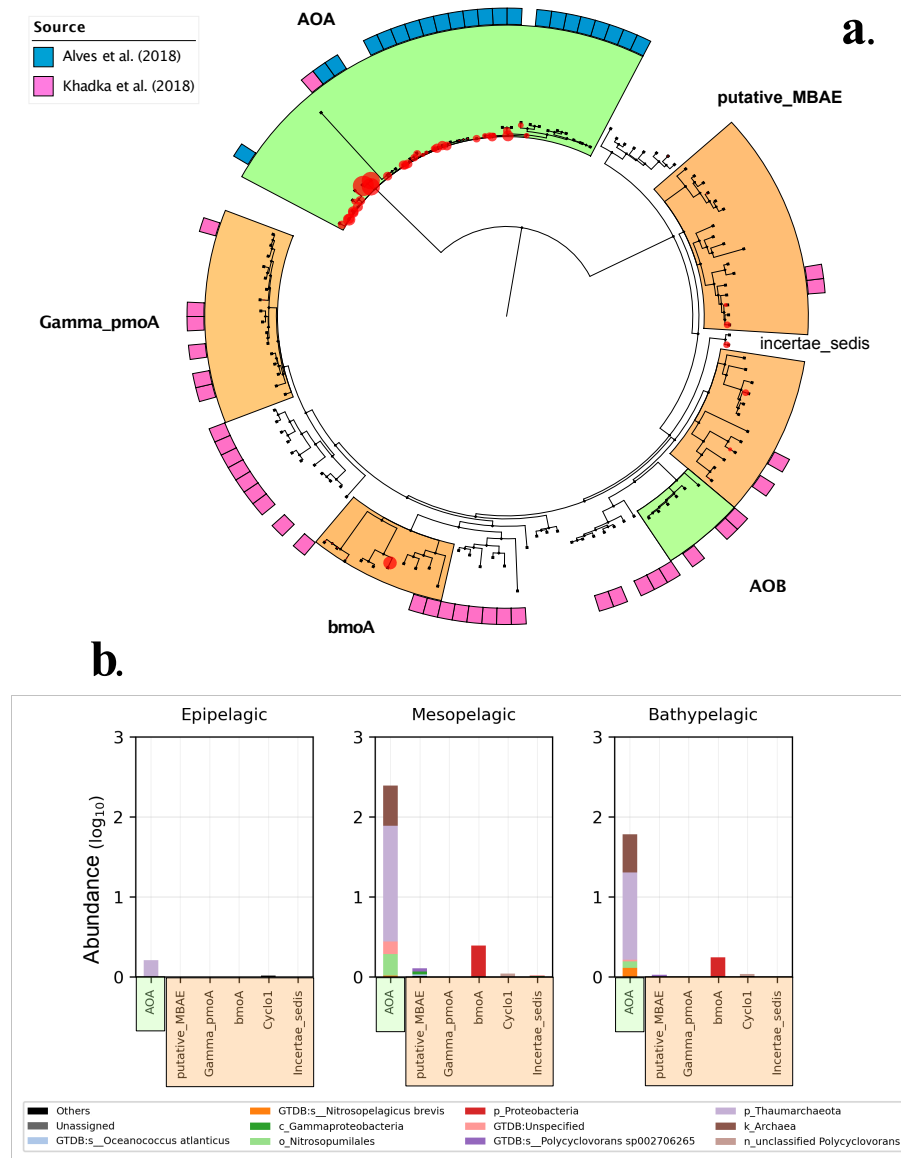

**Figure 4. Distinguishing non-functional from functional sequences capable of oxidizing ammonia improves guild assessment.** **a.** Reconstructed phylogeny of *amoA*, used as a reference tree to classify ammonia-oxidizing capable sequences. The tree contains 135 sequences with strong functional evidence based on either biochemical or physiological features, or inferred by homology to quality sequences (see Methods). For clarity, we only highlight clusters of sequences where metagenomic Malaspina samples have been successfully placed (full clustering in Sup. Fig. B). Among those, we distinguish sequence clusters with proven ammonium oxidation function (shaded greens) from sequences with probably a broader substrate spectrum and sequences with evidence of being non-functional for ammonia oxidation (shaded orange). Evidence of function was gathered from various sources, albeit the main ones are marked in pink and blue. **b.** Log representation of abundance values (TPM) of the *amoA* classified queries found in Malaspina metagenomes (red circles from a.). 31% of the unique sequences (1.01% of total TPM) obtained by automatic means are excluded with a conservative criterion (orange-shaded boxes corresponding to the non-univocal tree clusters).



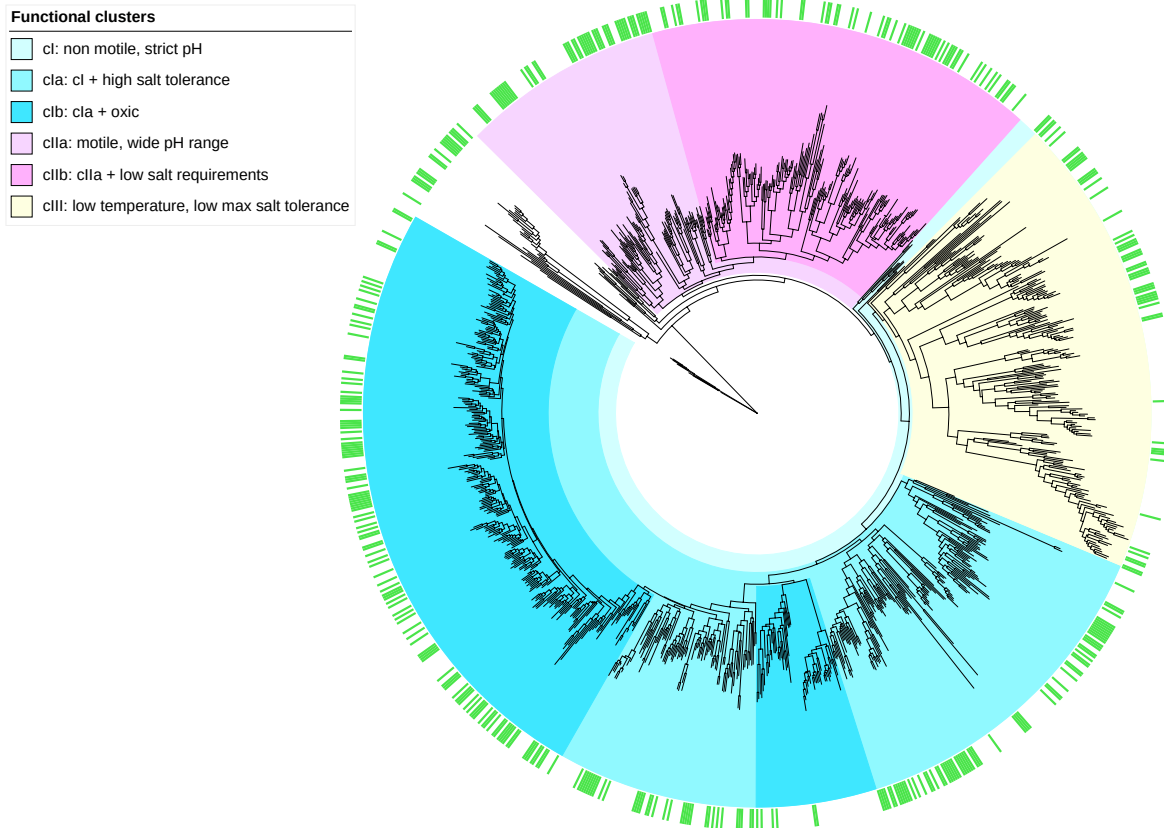

**Figure 5. Functional clustering of the putrescine-like binding protein reference tree.** The phylogenetic reconstruction corresponds to a polyamine-binding subunit of an ABC transporter. This tree will act as a metagenomic query classifier. However, defining functional sequence spaces below the threshold becomes complicated when there is a lack of experimental evidence. To avoid this dilemma, we focused on determining sequence spaces that may be affected by, and therefore adapted to, environmental variables. To determine this, environmental evidence vectors have been established for each organism represented by one or more leaves in the tree. Fifteen environmental variables have been curated for 321 organisms in pure culture, representing 478 of 1158 possible tree locations (green tags). In addition, these evidence labels are well distributed throughout the tree. Then, we built a null model by randomizing the environmental evidence labels so that the topology holds, to see how enriched the nodes are for these screened variables. The result consist of the colored regions representing significant nodes (one-tailed p-values < 0.003).

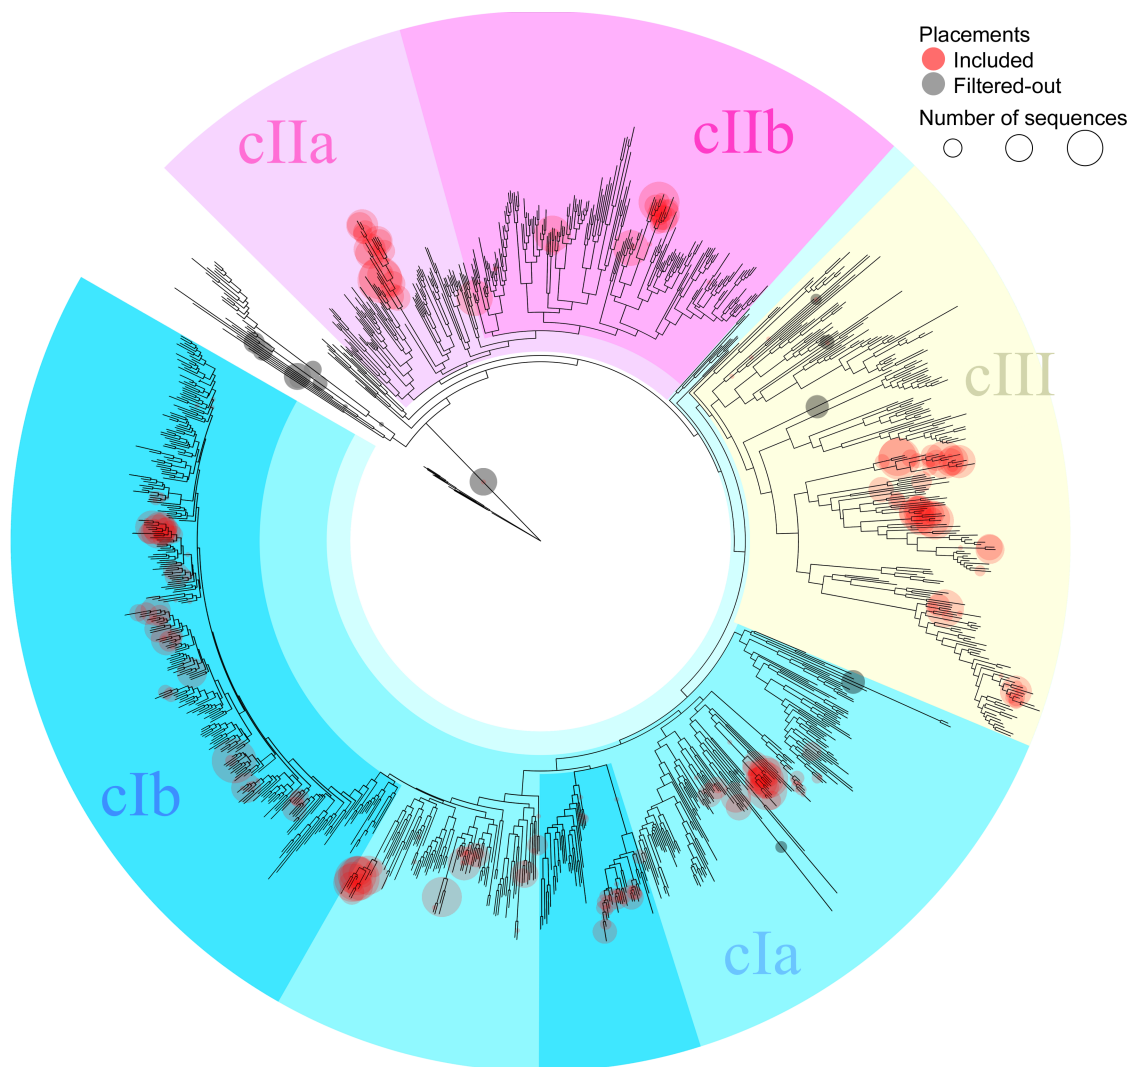

**Figure 6. Placement of short environmental sequences from Malaspina samples in the putrescine-like polyamines uptake reference tree.** The tree acts as a classifier of placed sequences (circles) that are close to being functionally synonymous by sharing environmental features. However, placed metagenomic sequences that do not fit well in the tree will be subject to further filtering (Methods). Most metagenomic queries are considered functional (red circles) while a small fraction are filtered out (4.13%, grey circles). All five implementations are represented in the 75 metagenomic samples used in this study distributed in the three main oceanic environments: epipelagic, mesopelagic, and bathypelagic.

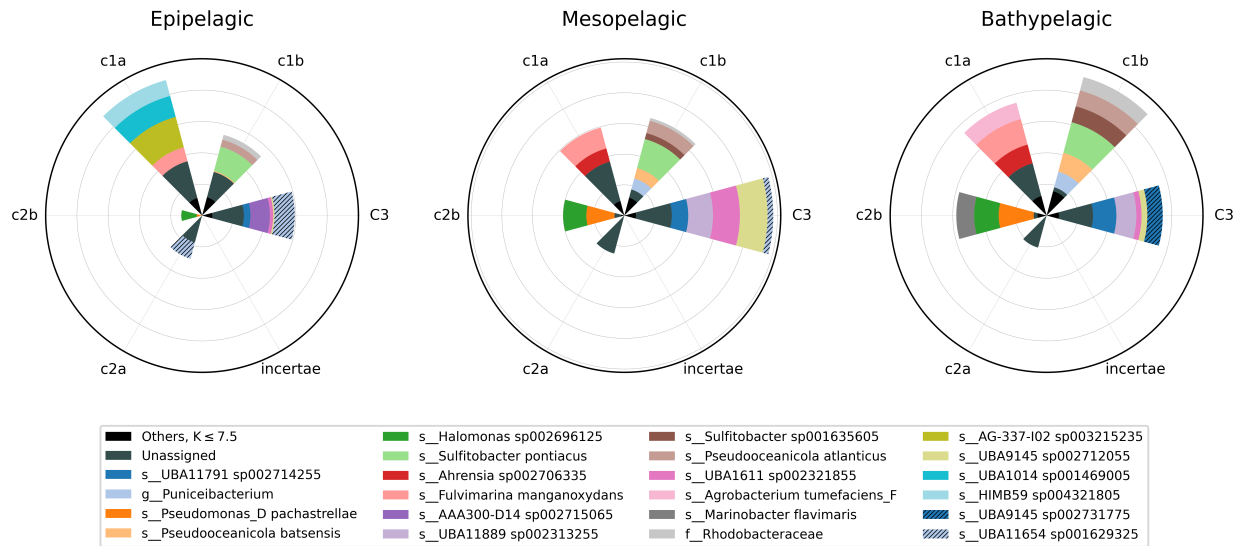

**Figure 7. Patterns of putrescine-like polyamines uptake guild.** This is a logarithmic representation of the top contributions to the  $k$  value for the taxonomic level of *Species*, assigned by GTDB. Here we observe only the largest contributors, whose  $k$  exceeds an adjustable threshold value, which in this case is  $k = 7.5$ . It is found that the contribution to the function fluctuates in both taxonomic identity and implementation preference, and that it is not an obvious relationship with depth. For example, the taxon UBA11654 sp001629325 (striped blue) contributes in the epipelagic with two different implementations, cIII and cIIa, it only contributes through cIII in the mesopelagic, while disappearing in the bathypelagic. Note how easy it is to observe distinct functional trends for each taxon, even in this particular case where the size of the input is unmanageable with traditional approaches. The *incertae* implementation is representing the absence of  $k$  values in the undefined sequence spaces of the reference tree.

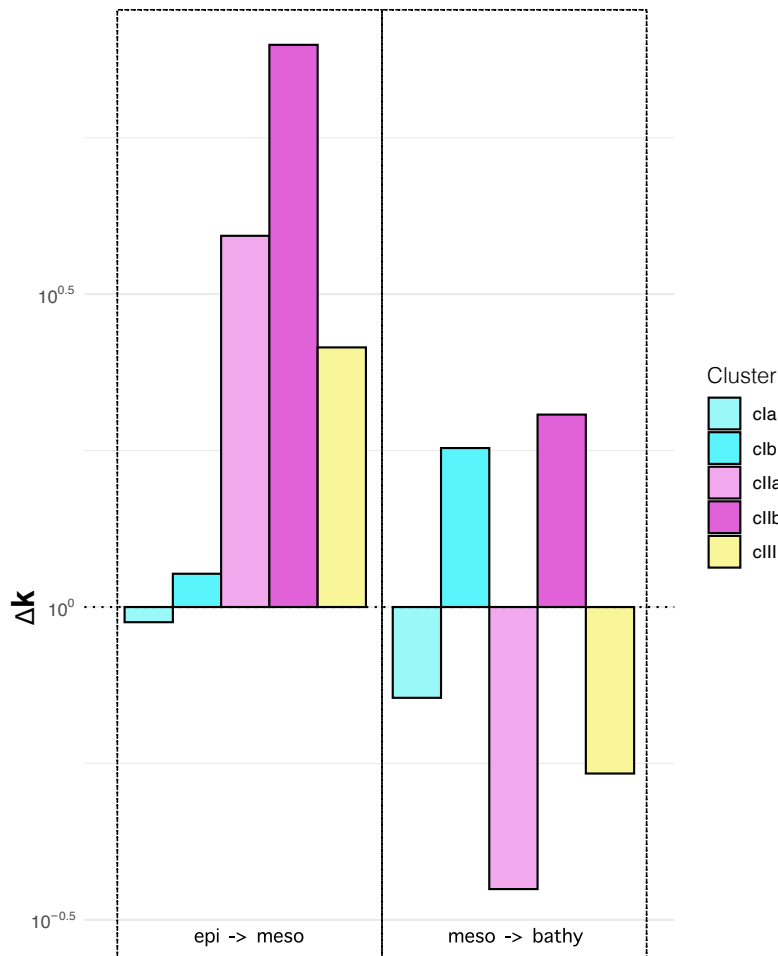

**Figure 8. Changes with depth in the importance of the polyamine uptake guild.** An advantage of using the  $K_f$  tensor to determine the structure of a guild is that we can visualize the functional contribution in a variety of ways. For example, here we look at the fold changes in the contribution between different ocean layers at the implementation level. It is easily observed which implementations depend the most on depth, which in this case are *cIIa* and *cIIb*, sequence spaces putatively adapted to a wide pH range. Coincidentally, the acute changes in these two implementations correspond with the area of the water column with the largest shift in pH toward acidity in the oxycline (Sup. Fig. G).
